# Supplementary material for: Directing visceral white adipocyte precursors to a thermogenic adipocyte fate improves insulin sensitivity in obese mice
Source: eLife. 2017 Jul 19;6:e27669. doi: 10.7554/eLife.27669 (PMC5552276; doi:10.7554/eLife.27669)
Supplement: Figure 4—source data 1. — DOI: http://dx.doi.org/10.7554/eLife.27669.008 [file elife-27669-fig4-data1.xlsx]

## Sheet: STable 1
Figure 4- source data 1: Genes whose expression is significantly altered in gonadal WAT of Vis-KO CL316,243 treated mice
Gene Name	log2 FC (KO/Control)	FDR
Cidea	3.94545	8.02384e-52
Ntrk3	4.13863	8.88918e-35
Pdlim2	2.16308	4.24203e-18
Khdrbs3	1.66173	1.76913e-17
Cpt1b	1.89171	1.2311e-14
Gchfr	3.28442	5.06556e-13
Cd55	-1.4563	2.46351e-12
Atp5g1	-1.75135	2.46351e-12
Fabp3	3.17131	5.5861e-12
Cxadr	1.91891	2.84097e-11
Impdh1	2.08257	1.49216e-10
Cpn2	2.76501	1.31392e-09
E430016F16Rik	3.82959	1.31392e-09
ChkbCpt1b	1.27561	1.60175e-09
Defb42	5.32809	3.33561e-09
Ucp1	2.90433	3.33561e-09
Mpzl2	2.34811	1.10811e-08
P2rx5	1.55015	3.25305e-08
Cmip	-1.23667	5.30049e-08
S100b	1.95211	7.38808e-08
Otop1	2.11085	1.08684e-07
Rsad1	1.17504	1.35045e-07
Samd7	7.75989	1.43822e-07
Mal	4.63557	1.45543e-07
Arvcf	1.36127	1.71514e-07
Akr1b3	0.944183	1.71514e-07
Gm6644	0.944376	1.71514e-07
Rbp4	-1.84113	3.18666e-07
Npr3	-2.51919	4.88254e-07
1700037H04Rik	1.03661	5.0815e-07
Lpgat1	-1.47976	5.82534e-07
Mlph	4.65865	1.06065e-06
Spock2	1.90517	1.06065e-06
Gstm7	4.25778	1.68086e-06
Gm5595	1.30401	2.44594e-06
Ptgds	4.78837	2.51443e-06
Gatm	-1.53525	3.338e-06
Smurf1	-0.920751	4.35003e-06
Fam115a	-1.16787	4.35003e-06
Slc27a2	6.29916	5.66435e-06
Gfra1	3.30418	5.85907e-06
Rgs9	3.56533	6.64437e-06
Rnpep	-0.79358	7.6544e-06
Tuba8	2.54937	7.78593e-06
Alb	-2.57257	8.53142e-06
Acot11	2.30036	9.85945e-06
Gpx8	1.69443	1.11094e-05
Cd24a	3.53758	1.15185e-05
Oplah	1.06801	1.15942e-05
Ezr	1.91708	1.32076e-05
Maoa	0.850891	1.32076e-05
Gprc5c	1.77807	1.55594e-05
Dhrs4	0.979743	1.57875e-05
Pla2g5	4.87558	1.62217e-05
Clic6	4.48556	1.64082e-05
Dsg2	7.21207	2.09766e-05
Myo5b	2.14883	2.09766e-05
Cyp2j12	5.07997	2.09766e-05
E330011O21Rik	1.64925	2.39751e-05
Spint2	2.65746	2.51055e-05
Slc5a7	-4.45752	3.04699e-05
Ppp1r1b	6.04063	3.35045e-05
1700047G03Rik	-2.76492	3.51347e-05
Hsd17b11	0.897671	3.51347e-05
Plet1	7.65062	3.80346e-05
Rnf43	5.79246	3.91068e-05
Chrdl2	7.52709	3.91068e-05
Ggt1	7.35772	4.24793e-05
Plin5	1.4465	4.24793e-05
Car14	2.75241	4.4084e-05
Folr1	4.49654	4.4084e-05
4930426D05Rik	7.20544	5.19084e-05
Chrnb1	1.37379	5.91801e-05
B4galnt2	7.1562	5.94238e-05
Pls1	7.10361	5.96794e-05
Mar9	-1.57353	6.07347e-05
Glrx	1.07265	6.13516e-05
Me2	-0.898364	6.85443e-05
Impa2	1.48841	7.05627e-05
F11r	0.714001	7.10376e-05
Epcam	7.178	7.20374e-05
Sorcs2	4.06614	7.46213e-05
Cdh3	2.78361	8.05172e-05
Wwc1	4.43766	8.10706e-05
Fam84b	0.949261	8.10706e-05
Adcy8	7.28707	8.10706e-05
Wdr96	5.45024	8.10706e-05
Gstm6	3.9935	8.10706e-05
Tctex1d4	6.26724	8.10706e-05
Scnn1a	3.23412	8.10706e-05
Egfl6	4.05018	8.1645e-05
Abca9	-1.76692	8.42394e-05
Slc30a2	4.52422	9.85958e-05
Dmpk	-1.12005	0.000100639
Slc9a5	1.52981	0.000106932
Celsr1	4.21128	0.000109794
Tmem132b	6.71646	0.000111915
Prom1	4.56686	0.000136154
1700016K19Rik	9.26205	0.000140868
Sepp1	-1.13424	0.000140868
D630039A03Rik	5.98887	0.000166185
Baiap2l2	2.95309	0.000173636
Des	1.02382	0.000179898
Dock10	-1.03591	0.000179898
Rassf2	-1.09875	0.000179898
Itgad	-3.93831	0.000179898
Angpt4	3.20213	0.000188751
Hephl1	-3.58564	0.000188751
Ubxn10	5.98435	0.000190799
Ccdc162	4.81489	0.000191469
Vstm2b	2.87339	0.000194719
Atp1b1	2.46824	0.000194914
Cdhr5	6.47859	0.000197752
Gnao1	0.872511	0.000202295
Kcnk1	5.99434	0.000202295
4930546K05Rik	2.02251	0.000202295
Tlr7	-1.95685	0.000211663
Fhad1	6.57011	0.000216454
Ccdc40	5.54902	0.000266733
Gss	0.893793	0.00026987
Fam131c	5.5788	0.000276958
Fndc7	4.65571	0.000279314
Rasl12	1.25747	0.000283267
Galnt3	6.89299	0.000285264
Wnk2	4.85442	0.000290376
Cemip	6.78462	0.000290406
Cldn3	3.40227	0.000300304
Proc	8.45471	0.000300367
Tmem125	4.27663	0.000300367
Ttll10	8.26214	0.000306549
Cacng5	4.48516	0.000321188
Fbp2	2.44452	0.000321188
Tmem150c	4.28864	0.000321188
Gm973	5.99366	0.000323213
Pou3f3	9.95978	0.000328002
Plxnc1	-1.43899	0.000328002
Dock2	-1.50255	0.000335014
Hoxb9	3.80263	0.000337074
Srd5a2	9.69576	0.000337074
Fgfr4	6.42757	0.000338265
Fam83a	-1.48281	0.000338337
Krt8	4.26172	0.000347347
Pipox	4.90712	0.000353832
Cutal	4.34793	0.000364826
Dyrk3	4.55388	0.000373493
Irx2	5.64032	0.000373493
Lad1	5.62539	0.000384548
Susd4	3.99093	0.000384548
Lhx1	7.66658	0.000384548
Cftr	3.59013	0.000384548
Acsbg1	4.63352	0.000384548
Wfdc8	7.99148	0.000391765
Acpp	4.06807	0.000391765
Nrip1	-1.38599	0.000391885
Fabp5	-1.18482	0.000397789
Lrrc71	4.16163	0.000397789
Tmem45b	-1.5705	0.000397789
Tmem108	2.69303	0.000397789
Adrbk2	0.996024	0.000423539
Fam183b	5.87226	0.00042867
Prss56	9.57954	0.000433678
Gstm1	0.882149	0.000433678
Dnah6	4.87511	0.000442185
Rgs11	4.4801	0.000451689
Plxnb1	2.09923	0.000451689
Igsf11	5.50342	0.000454203
Tmem64	0.736434	0.000454203
Dscaml1	7.23174	0.000454203
Cybb	-1.75485	0.000454203
Itga4	-1.28281	0.000458739
Acot13	0.755583	0.000461728
Ttc34	8.18394	0.000461728
Chad	7.71476	0.000469483
Dnah11	6.87536	0.000469483
Fam167a	4.59117	0.000469483
H2-DMb2	2.31935	0.000472721
Dpy30	0.829471	0.000472721
Csf1r	-1.58072	0.000472721
Map7d2	-1.82977	0.000472721
Myb	4.3707	0.000482516
Masp1	-1.66964	0.000482516
Sntn	10.5031	0.000483379
Snhg11	-1.49807	0.000483379
Wdr65	6.25529	0.000483379
Adcy1	2.71077	0.00048654
Irx1	6.88745	0.000493816
Rab17	7.76882	0.000496964
Cers6	-1.61092	0.0005158
2010003K11Rik	0.91119	0.000532367
Gipc2	5.54466	0.000532367
1600029I14Rik	7.938	0.000540167
Cyp2j13	8.76392	0.000556735
Pank3	-1.21376	0.000557083
Dnajc22	5.43928	0.000570412
Odc1	0.804463	0.000593035
Rsph1	3.76258	0.000597111
Tnks	-0.828689	0.000597124
Rab37	2.08534	0.000600203
Cpne2	-1.09723	0.000619404
Enpp2	-0.82241	0.000621891
Tlr12	5.37758	0.000621891
Rab11fip4	3.48584	0.000634028
Tctex1d1	7.82571	0.000634028
Bex1	5.19947	0.000636647
Calml3	7.14468	0.000656244
Ccdc39	3.79043	0.000656244
Rhpn2	1.75177	0.000656244
Plekha6	3.04898	0.000672203
Lace1	0.702769	0.000672203
Dsp	5.25645	0.000672203
Tmprss2	6.60436	0.000672203
Stap2	0.99714	0.000672203
Nme5	4.10878	0.000672203
Ptafr	-2.64736	0.000672203
Gusb	-0.84232	0.000672203
Ccdc151	4.86213	0.000672203
Slc9a3r1	1.49601	0.000689014
Plekhb1	2.52422	0.000689014
Mt3	6.26353	0.000689014
Strn	-1.1255	0.000694605
Aldh1l1	-0.826959	0.000694605
Spint1	4.25587	0.000702757
Sectm1b	8.28075	0.0007134
Rims2	4.99221	0.00071561
Tulp2	3.07845	0.000744112
Pon1	1.46241	0.000745688
Star	-1.68951	0.000745688
Mir6903	-2.15994	0.000759002
Esyt1	-0.704685	0.000759002
Tshr	-1.11763	0.000759002
Adam7	6.25344	0.000759002
Cacna1h	3.58516	0.000759002
Tcte1	6.28492	0.000759002
Cadm4	2.01028	0.000759002
Gpr64	2.00503	0.000759002
Slc9a3	7.35547	0.000778042
Gpr113	2.59545	0.000778042
Mcoln3	8.52286	0.000779181
Phospho1	1.02125	0.000785265
Zfp750	9.17918	0.000785265
Slc22a12	3.76593	0.000785265
Stmnd1	3.59094	0.000789443
Pax8	8.27699	0.000789443
Cmklr1	-1.27792	0.00079032
Atp6v0a4	3.02811	0.000792762
Cldn1	2.30165	0.000792796
Pald1	0.787838	0.000798723
C1galt1	-1.03572	0.000798723
Scnn1b	5.41445	0.000798723
Abhd6	0.695477	0.000800062
Tmem79	1.11592	0.000800062
Iqgap1	-0.786364	0.000800062
Elf3	7.53971	0.000801353
Cldn7	7.19568	0.000801353
Cfi	5.15155	0.000801353
Rasa3	-0.772884	0.000801353
Cdh1	6.58691	0.000801353
Tlr8	-2.33572	0.000801353
Mdm4	-0.913244	0.000804539
Sesn1	-0.711272	0.000804539
Enkur	4.21534	0.000804539
Clrn3	9.30368	0.000804539
Ap1m2	6.58748	0.000804539
Ar	-1.62431	0.000804539
1500015O10Rik	2.73048	0.000814824
Espn	3.12516	0.000814824
Adamts12	-1.68376	0.000816345
6820408C15Rik	4.45811	0.000816345
Akr1b10	0.671428	0.000816345
Cd163	-1.86357	0.000816345
Faah	3.03136	0.000831594
Myo5c	2.29006	0.000835668
Kcnj16	4.58515	0.000848441
Tlr1	-2.25166	0.000848441
Dnah10	4.06648	0.000856968
Prss8	4.54426	0.000856968
Vil1	4.48832	0.000865322
1700013F07Rik	8.33912	0.000883071
Ccdc135	7.40498	0.000895027
Wdr78	1.97397	0.000896538
Paqr5	5.07174	0.000896538
Igfbp2	2.20456	0.000896714
Maats1	4.84343	0.000896714
Shank2	3.94657	0.000910571
Dao	7.30879	0.000912458
Grip1	4.65014	0.00091414
Scube1	4.27704	0.000915139
Bex2	5.18688	0.000931911
Hnf1b	6.96239	0.000936422
Slamf7	-1.61856	0.000936789
Ddc	4.55111	0.000981005
Dnali1	6.12213	0.000981005
Ndufa5	0.796777	0.000981005
Slc34a1	8.12215	0.000981149
Rem2	6.23035	0.000981149
Zswim5	3.491	0.000981149
Inpp5j	2.97503	0.000992501
Arg2	6.25641	0.000992501
Lmo7	0.846856	0.000992501
Slc39a4	2.81913	0.000992501
Unc5cl	5.72667	0.000992501
Fermt1	8.11214	0.000992501
Gpt2	-1.0103	0.00100232
Lyz2	-1.78247	0.00100588
Wdr95	6.62484	0.00100773
Slc38a4	3.34055	0.00100844
Tenm4	-1.10545	0.00102098
C730036E19Rik	5.91284	0.00102147
Ly9	-2.28453	0.00104212
Lrrc75b	3.26613	0.00104212
Fyb	-1.4927	0.00104436
Igfbp1	8.09299	0.00105056
Tln2	-1.04288	0.00105056
Slc6a17	4.06937	0.001054
Slc30a3	6.84714	0.001054
Hoxb8	1.66553	0.00105593
Myo5a	-0.938719	0.00105644
Cd209d	-1.80462	0.00107193
Plch1	4.61645	0.00109832
Mdk	2.34467	0.00113449
Cblc	6.6028	0.00113449
Lrp2	3.44751	0.00113814
Eps8l2	2.17187	0.00116134
Mogat2	-1.81304	0.0011628
Cd86	-1.48651	0.00117525
Kndc1	7.61369	0.00117525
Gm9926	8.07699	0.00117655
Pax2	7.07937	0.00120232
Slc16a13	2.21734	0.00120255
Dnah9	7.04993	0.00120637
Notum	5.93862	0.00123815
Epm2aip1	-0.638738	0.00123815
Fam179a	7.22674	0.00124555
Slc38a3	3.54916	0.00124555
Sec14l4	1.79537	0.00125967
Iqcg	3.06736	0.00125967
Syt13	4.37729	0.00125967
Ghrhr	8.43332	0.00125967
Sema3b	1.97908	0.00125967
Nckap1l	-1.58787	0.00126378
Ppil6	3.63693	0.00128313
C1qc	-1.15256	0.001293
Cbl	-1.4838	0.0013082
Ccdc42b	7.93188	0.00134167
Dhcr24	-0.970137	0.00135948
Fam189a2	1.14975	0.00138174
Tchh	2.42554	0.00138174
Ccdc146	5.73456	0.00138174
Kl	5.95582	0.00138174
Prune2	-2.02554	0.00139585
Ndrg1	0.869262	0.00141454
Prr15l	6.15481	0.00144221
Capsl	4.44998	0.0014642
Ehf	5.03134	0.0014642
Dnah5	7.87074	0.00150708
C1qa	-1.22894	0.00150708
Tm4sf4	7.89257	0.00150766
Tcf7	3.76777	0.00151587
1700028P14Rik	7.62418	0.00151823
Slc25a42	1.03578	0.00153165
Lrp1	-1.01322	0.00153943
Plekhh1	3.75235	0.00154329
S100a1	0.728705	0.00154762
Ank3	2.58646	0.00155898
Fam47e	8.04612	0.00157138
Kcnmb1	3.31776	0.00158001
Ccdc113	6.84746	0.00159047
Dnah2	3.87303	0.00159081
Slc26a3	6.23192	0.00162133
Eppk1	1.51219	0.00162133
Fam216b	7.31061	0.00162454
Sult1c2	7.07721	0.00162454
Gas2l2	6.14096	0.00164005
Epb4.1l4b	2.19302	0.00164005
Kazn	1.47768	0.00164932
Slc4a7	-0.834669	0.00165884
Psmb11	3.8574	0.00165884
Btg3	0.771537	0.00165884
Gm7334	0.771537	0.00165884
Arhgef16	3.8191	0.00165884
BC048546	8.03365	0.00165884
BC051019	6.1521	0.00165884
Ak7	6.07365	0.00170725
Prkg2	2.37126	0.00170725
Esrrg	1.36483	0.00171428
Stac2	-2.06324	0.00171859
Krt18	3.23732	0.00171859
Col6a1	-1.22787	0.00172379
Stx2	-0.748928	0.00172379
Slc25a20	0.894495	0.00172379
2410004P03Rik	5.60348	0.00172651
Ramp3	4.45332	0.00173126
Iqcd	3.92814	0.00173126
Kif26b	4.5071	0.00177329
Rab3ip	0.71239	0.00177329
1110017D15Rik	5.0136	0.00177329
Calml4	3.30503	0.00177951
Ccdc13	5.34125	0.00177973
Ankrd34b	5.87548	0.00180173
Tjp3	3.45382	0.0018073
Slc36a2	0.712039	0.00180847
Gfra2	-1.20157	0.00184646
Nmb	1.69108	0.0018641
Ttc21a	5.64477	0.0018641
E230008N13Rik	4.80243	0.00188025
Eno4	5.09993	0.00188273
Gm14137	3.8049	0.00189109
Tapbpl	0.879087	0.00189223
Atp11a	1.11901	0.00191797
Lmbrd2	-1.40998	0.00192876
Csf2rb	1.04784	0.00195926
Cnga3	6.42929	0.00196376
Sel1l	-0.622443	0.00196376
Fbxo45	-0.881989	0.00196376
Ddit4l	3.80498	0.00196376
Crabp1	7.73089	0.00196376
Klhl28	-1.18252	0.00201836
Kcnk5	3.01899	0.0020194
Dnaja4	2.14945	0.0020194
Cdkl4	3.78573	0.00202964
Ces1b	9.01885	0.00202964
Ppp1r36	5.01604	0.00203293
A630007B06Rik	-1.0613	0.00203325
Nav2	2.24697	0.00204232
Prom2	7.50969	0.00206138
Trank1	4.48542	0.00206138
Nid1	-1.15077	0.00207269
Slc34a2	6.32515	0.00207269
Cd209b	-1.72491	0.00207269
Osr2	2.45201	0.00210957
Slc22a1	5.73489	0.00210957
Ccdc78	5.11618	0.00210957
Cyp4f15	6.02851	0.00210957
2010015L04Rik	1.84125	0.00210957
5830418K08Rik	-0.805036	0.00211195
Ccdc81	5.62027	0.00213345
Syt2	4.98656	0.00213909
Mapk15	5.23839	0.00215788
Ttll6	4.8609	0.0021827
Igsf5	5.51167	0.00220073
Golgb1	-0.722741	0.00221566
Stard10	2.20584	0.00221566
Ihh	4.60969	0.00222771
Hp	-1.18114	0.00222771
Clec18a	4.87125	0.00222836
Sash3	-1.43415	0.00222836
AI607873	-1.06789	0.00223319
Wdr52	5.99087	0.00224662
Prr18	4.62532	0.00226189
Hadhb	0.70317	0.00226305
Col5a3	-1.26207	0.00226305
Ikzf1	-1.14555	0.00226564
Arl11	-2.46965	0.0022658
Bmp7	3.07074	0.00228055
Sall1	6.42154	0.00230134
Olfm4	6.40764	0.0023066
Gsg1l	5.24043	0.00236187
Foxj1	6.55783	0.00237229
Klhl24	-0.839358	0.0023801
Eci2	0.62796	0.00239482
Marveld3	3.02196	0.00239482
Uhmk1	-1.5512	0.00246506
Rdh18-ps	5.10936	0.00246506
Klhl14	6.0806	0.00246506
Scn7a	-0.889246	0.00246506
Phgdh	-0.803896	0.00246506
Ly86	-1.23538	0.00250921
Dtx1	3.16716	0.00250921
Haao	3.26572	0.00254024
Slc7a9	7.0665	0.00254024
Spag16	7.56555	0.0025534
Dnajc6	1.83286	0.0025534
Aldob	7.46319	0.0025621
Iyd	6.61396	0.00256923
Slc16a11	3.67658	0.00256923
1700003M02Rik	7.55802	0.00259863
Odf3b	3.20404	0.00262386
Gjb1	7.58274	0.00262386
Tmem27	5.72864	0.00262386
Sephs2	0.69664	0.00262575
Spata18	7.2625	0.00263498
Tmed6	7.78448	0.00264464
Mlc1	5.70186	0.0026528
Slc44a4	5.63859	0.00267904
Gsn	-0.83212	0.00268366
Slc17a6	7.53495	0.00268366
B4galnt3	6.28278	0.00269691
Ap1s2	1.72784	0.00269691
Spag17	7.54531	0.00269977
Rgs22	6.50762	0.00269992
Ttc9	2.8985	0.00271559
Alg10b	-0.781573	0.00271868
Bcam	0.879042	0.00271906
Tbc1d9	1.99376	0.00272559
Zfp92	4.76658	0.00272559
Bex4	4.28788	0.00272559
Zmynd10	4.85177	0.002726
Ccdc114	2.20437	0.0027297
Acsf2	0.652007	0.0027479
Kcnh3	3.29987	0.0027479
1810064F22Rik	7.47886	0.0027479
Clmp	-1.13777	0.0027479
Gria1	4.22885	0.00274802
6330403K07Rik	6.85427	0.00274802
Tceal5	3.08618	0.0027755
Atp2c2	7.16956	0.00279629
Arhgef17	0.659786	0.00279832
Ccdc65	4.42191	0.00280206
Cdcp1	5.80564	0.00280206
Bspry	4.17702	0.00281907
Adra2c	2.8456	0.00284277
1700040L02Rik	2.99064	0.00286267
Lbh	0.881693	0.00286267
Gstm5	2.03868	0.00286267
P2ry6	-1.48365	0.00286267
Polr2i	0.748502	0.00289907
Aqp9	2.76587	0.00289907
Gbgt1	-1.61664	0.00291123
Agr3	7.72097	0.00291931
Nek5	3.3013	0.00291931
Cpeb2	-1.28215	0.0029297
Zfyve26	-0.669111	0.00299311
Pim1	0.878971	0.00299311
Wfdc1	2.00664	0.00299311
Fmn2	4.29784	0.00301306
Entpd8	7.96402	0.00302174
D830031N03Rik	-1.9736	0.00306158
1700007G11Rik	5.25325	0.00306158
Mmp7	7.6946	0.00307587
Arnt2	4.28623	0.00309629
Rspo1	1.49042	0.0031016
Ccdc33	5.45105	0.00310277
Xrn1	-1.11945	0.00312616
Cdhr3	3.14256	0.00315725
Cadm1	1.71598	0.00315725
1700009P17Rik	1.98376	0.00319438
Oxtr	-1.93542	0.00319438
Fmr1	-0.841947	0.00319812
Nr2f2	0.594509	0.00327316
Fbxl4	-0.652051	0.00327538
Nnt	-0.930107	0.00342682
Bmper	-0.776341	0.00351855
Cacna2d1	-1.00131	0.00354634
Sucla2	0.729329	0.00356894
St14	3.10152	0.00358121
Greb1	4.53348	0.0036128
Uox	6.65478	0.00362263
Fam229a	5.5913	0.0036319
Wipi1	-0.83581	0.00363827
Prkcb	-0.983434	0.00365602
Defb29	6.91053	0.00369172
Enpep	-1.05968	0.0037002
Bbox1	6.84277	0.00370747
Sh3gl2	3.14058	0.00373311
B4galnt4	3.93992	0.00373663
Tmem212	7.83568	0.00374665
Col12a1	-1.39209	0.00376161
2017-03-04	7.02897	0.00377745
Efcab1	5.55764	0.00377745
Cuzd1	6.56553	0.00377745
Tppp3	1.08903	0.00377745
1700088E04Rik	2.39665	0.00379406
Mib1	-1.22354	0.00379406
Fcgr3	-1.28966	0.00379923
Sim1	6.77092	0.00379923
Spag6	6.95471	0.00379923
Dpysl5	2.08943	0.00379923
Ccdc60	6.31526	0.00379923
Usp35	-1.17771	0.00379923
Cdc42ep1	-0.856922	0.0038116
Gm10804	6.29846	0.0038116
Mob3a	-0.817041	0.0038887
Iqub	5.22446	0.00390208
Cpne8	-0.682132	0.00390834
Kcns3	-1.17962	0.00392094
A330021E22Rik	3.21532	0.00392237
Lamc2	2.21412	0.00396148
Glg1	-0.773908	0.00396431
Dpt	-0.938692	0.00400938
Ptprt	5.79564	0.00402696
Zfc3h1	-0.674099	0.00404958
Clec5a	-1.80868	0.00407646
Col25a1	4.50375	0.00407842
Serpina1c	2.99209	0.00416409
Wdr16	7.38358	0.00416534
4932418E24Rik	5.20719	0.00416534
Akr1c19	4.65555	0.0041709
4931429I11Rik	6.3206	0.00420303
Cldn10	2.26821	0.00420832
Hspa12a	-0.978941	0.00420832
Col27a1	1.34543	0.00420832
Xylb	2.56565	0.00420832
Rmst	5.79549	0.00425026
Nrbp2	0.727715	0.00425026
Erich2	4.79508	0.00425026
Hnf4a	6.87792	0.00425026
Drc1	4.74679	0.00425026
Slc8b1	-0.824346	0.00425026
Lrrc23	3.36071	0.00425026
Hebp1	-0.639952	0.00425026
Drd4	7.0115	0.00425026
Mtss1l	-0.627692	0.00425026
Tmem170b	-0.700318	0.00426532
Trafd1	-0.586293	0.00426532
Btk	-1.55133	0.0042927
Epg5	-0.61564	0.00429367
1700011H14Rik	6.86998	0.00430166
Efcab6	7.63273	0.00434043
Dio1	7.69092	0.00434043
Acadsb	-0.822152	0.00434043
Stk32c	2.16217	0.00434043
Nipal3	0.927308	0.00434282
Crispld2	0.879856	0.00436772
Tm4sf1	0.66173	0.00438976
Dnah1	3.27129	0.00444076
Fzd6	1.21878	0.00447972
Selplg	-1.13603	0.00447972
1700024G13Rik	7.07254	0.00451826
4930452B06Rik	3.46524	0.00453323
Mcoln2	-2.10323	0.00458075
Emr1	-1.87524	0.00459547
Elovl1	-0.692652	0.00459547
Lrrc48	3.17859	0.00461759
Syk	-1.34663	0.00461759
Cycs	0.660061	0.00461759
Tmem43	-0.942403	0.00463427
Cldn9	7.01799	0.00464419
Pdzk1	6.75916	0.0046659
Dnaic2	3.32965	0.00471558
Stxbp2	0.546443	0.00471558
Hip1	-0.690276	0.0047313
Tmem102	3.58126	0.00474003
Tekt4	6.70519	0.00474924
Cry2	-0.630748	0.00474924
Lrrc34	6.00154	0.00474924
Atp1a3	-1.53907	0.00475123
Sowahb	7.09194	0.00475229
Misp	3.45713	0.00476323
Apol6	-0.784425	0.00476323
Ccdc50	-0.669944	0.00476323
Fam102b	-1.0063	0.00476323
Rbm11	3.78333	0.0048397
Anks4b	7.31274	0.00485386
Slc7a15	6.70834	0.00487041
Zbbx	6.92134	0.00487041
Syt5	5.28585	0.00487041
1700026D08Rik	5.52615	0.00487041
Zmym3	0.562291	0.00487041
Sectm1a	3.836	0.00487051
Ptp4a3	0.648785	0.00487051
Mgat3	1.92823	0.00487051
Ccdc19	3.36711	0.00487235
2610028H24Rik	7.53881	0.00490004
Sult1d1	5.859	0.00490004
Ccdc121	5.84343	0.00495478
Ms4a6b	-1.36899	0.00495478
Dock7	-0.666188	0.00495847
Plagl1	-0.995633	0.00496662
Enah	1.50161	0.00496728
P2rx2	4.78248	0.00496728
Fcgr2b	-0.885363	0.00497635
Agpat5	0.581683	0.00498695
Tlr9	-1.44826	0.00501267
Casc1	3.52348	0.00505207
Gjb3	4.12781	0.00506869
Rdh16	5.76351	0.00512298
Ccdc30	2.65559	0.00513195
Trp73	4.57915	0.00513195
Phldb1	-0.858348	0.00513195
Rora	-0.867706	0.00513195
Plek	-1.42777	0.00513875
Pip5k1b	2.72385	0.00513875
Unc5a	-1.98097	0.00514017
Ticam2	-1.96668	0.00514111
Spns2	1.36074	0.00518068
Ccl28	2.84657	0.00518068
Hunk	2.78968	0.00518068
Pcp4	5.85472	0.00518068
P4hb	-0.751706	0.00519749
Pdzd2	-1.02254	0.00521633
Gja1	1.62656	0.00522014
Nlrp3	-2.11119	0.00522014
Wdr63	6.93678	0.00522014
Mir7673	-5.18351	0.00522014
Igfn1	5.98428	0.00527025
Perp	2.71063	0.00527025
Alox12	2.65476	0.00527025
Lpp	-0.505495	0.00527025
Ccdc80	-1.0947	0.00527025
Tulp4	-0.631426	0.00527025
Arhgap19	-1.08747	0.00527025
Pdpr	-1.12959	0.00527025
4833428L15Rik	7.43483	0.00527025
Rassf10	1.62287	0.00527513
Fam166b	5.40892	0.00528729
1700012P22Rik	7.53664	0.00532126
Umod	7.34546	0.00537539
Ccdc160	2.60531	0.00537539
Tmem229a	4.11499	0.00539708
Laptm5	-1.16562	0.00541231
Eppin	5.3201	0.00544679
Habp2	4.56703	0.00548718
Car5b	-0.968244	0.00553819
Acss3	-1.16188	0.00554865
Serpina3n	-1.25841	0.00554865
C1qb	-1.27895	0.00555867
Mgp	0.90346	0.00558809
Slc6a20a	5.49378	0.00559652
Apobec1	-1.07007	0.00561051
Kif12	6.11159	0.00573277
Wnt8b	-2.78188	0.00575889
Kif27	2.2566	0.00583648
Ndufaf4	0.64759	0.00584509
Lyz1	-1.30842	0.00584953
Camk1d	-1.26995	0.00589826
1700094D03Rik	1.72918	0.00589826
Sncg	-1.29658	0.00596097
Cdh16	7.24005	0.00597602
2310007L24Rik	6.12294	0.00598609
Dnaic1	4.13642	0.00598609
Iqca	6.26379	0.00598996
Ndufa3	0.672668	0.00598996
Ctxn1	2.3143	0.00598996
Ciapin1	0.698062	0.00599547
Zbed6	-1.69626	0.00606998
Cldn2	7.30239	0.00606998
AI314278	4.29822	0.00610172
Megf11	4.14339	0.00612298
Meig1	6.01402	0.00615533
Gstt2	0.770875	0.00616695
Ccdc153	7.05056	0.00616695
Prr15	2.03083	0.00617071
Gm15987	-3.80699	0.00618973
Eddm3b	5.42591	0.00620156
Lgals1	-0.674602	0.00631752
Nme9	6.99187	0.00632435
Slco1c1	3.12667	0.00634872
2017-09-03	2.17621	0.00640586
1700012B09Rik	6.54666	0.00641132
D430019H16Rik	-1.27027	0.00641985
Nlrp1c-ps	-3.97119	0.00646406
Fsip1	5.24702	0.00646406
Stk32b	5.23456	0.0065002
Mia2	5.39725	0.00650867
Ccdc37	2.93059	0.00650867
Tenm2	4.42852	0.00652416
Ocln	3.62118	0.0065248
Rbfox3	3.31117	0.00653711
Mpeg1	-1.83392	0.00653711
Raet1c	1.9798	0.00655419
9930111J21Rik1	-1.45111	0.00660373
Ogdhl	3.15638	0.00664593
Ccdc24	3.10737	0.00665999
Myot	7.85118	0.00680911
Gyltl1b	3.71373	0.0068299
Mia	5.12392	0.00683412
Nefh	3.77906	0.0068462
Acadvl	0.641275	0.00685438
Stpg1	4.40022	0.00687232
Zfhx4	-0.996627	0.0069032
AU022754	6.36088	0.00695275
Stk33	5.74695	0.0069585
Sorbs1	-0.947821	0.00698802
Dnaaf1	4.54805	0.00698802
Scd1	-2.17799	0.00703529
Cyb561	1.54778	0.00703909
Lrat	3.86128	0.00703909
Sox9	2.3312	0.00705481
Slc52a3	2.04842	0.00707871
Aqp4	6.15373	0.00711192
Acot12	5.56107	0.00714123
Atp5j2	0.646466	0.00718658
Il10ra	-1.2596	0.00718658
Gm608	-0.727113	0.00719994
Ctsc	-1.01925	0.007301
Slc35f2	4.60297	0.007301
Acat3	1.71574	0.00732244
Apbb1ip	-1.31053	0.00738248
5730559C18Rik	5.64018	0.00741445
Mgst3	-0.598015	0.0074393
Hhipl2	5.63365	0.0074393
Ddt	0.704534	0.0074393
Gm5460	-1.37907	0.0074393
Ms4a6c	-1.27173	0.00748999
Pitx2	7.30193	0.00753363
Hnf1a	5.51247	0.00760571
P2rx7	-0.981047	0.00760571
Serpina1a	1.56763	0.00767108
Slc9a9	-1.24728	0.00767108
Dkk3	1.70808	0.00769799
Cd37	-0.973671	0.0077655
4930451C15Rik	5.53255	0.00778333
Asb14	7.18152	0.00779812
Stoml3	6.7911	0.00779812
Pklr	6.45036	0.00781551
Lrguk	4.19852	0.00781551
Map3k19	2.83207	0.00782078
Sec14l3	6.69645	0.00783234
4932443I19Rik	7.13756	0.00783234
Tsnaxip1	5.8116	0.00783234
Dynlrb2	5.74019	0.00783234
Adtrp	1.46619	0.00790003
Hoxd3	1.94117	0.00796185
Emx2	2.21873	0.00801163
Myrf	1.26409	0.00803268
2017-09-09	-0.658433	0.00818041
Trip11	-1.04391	0.00818041
Adrb1	1.23355	0.00818041
D630003M21Rik	3.05915	0.00818041
Rbp2	5.02527	0.00823631
Crocc	1.75992	0.008263
Tst	1.13321	0.00827089
Aoc1	3.64499	0.00827094
Tmem25	2.72698	0.00828845
Mrpl47	0.657463	0.00835285
Vtcn1	2.8283	0.00835285
Vwa5b1	6.87979	0.00835779
Slc35f3	5.24703	0.00841515
Myo1f	-1.64187	0.00846294
Hap1	1.73788	0.00866772
Atp1a1	1.30541	0.00874206
Limch1	0.641281	0.00874206
Kcnf1	7.41775	0.00878908
Il1rn	-2.7257	0.00887287
E030019B06Rik	6.65201	0.00887287
Mtmr11	1.10802	0.00888146
Ceacam20	6.01478	0.00888435
1700001C02Rik	5.51136	0.00888803
Ankrd55	-3.15658	0.00891858
Gjb2	3.16582	0.00891858
Ddr1	0.778644	0.00891858
Ppp2r2c	6.90941	0.00893332
Mpp2	0.780553	0.00895556
Armc4	4.45007	0.00899835
Bub1b	-1.46329	0.00902569
Tmem107	1.98404	0.009126
Etohi1	-0.722423	0.009126
Slc16a1	0.761394	0.009126
Ccl24	-2.02237	0.009126
1700003E16Rik	3.83288	0.009126
Cd300a	-1.39523	0.00913042
Smoc1	-0.816082	0.00917939
Bmp8b	2.58329	0.00918514
Mxd1	-0.767764	0.00921918
P2ry12	-1.30148	0.00927319
Ncapg2	-0.842047	0.00945791
4932411E22Rik	4.83726	0.00945993
2010107E04Rik	0.690649	0.00955041
Cd84	-1.55797	0.00960575
Emid1	1.74318	0.00960575
Slc25a10	-1.05061	0.00960575
Lrrc10b	3.52	0.00971495
Grrp1	1.47179	0.00971495
Mdh1b	5.62011	0.00971514
Kdf1	5.43746	0.00971514
Nxf3	3.65056	0.00971514
Ankrd6	1.78926	0.00973261
2310007B03Rik	5.87372	0.00984303
Tnnt2	3.32976	0.0098535
Dio2	2.08253	0.0098866
Morn3	5.58226	0.0098866
Cd33	-1.30452	0.0098866
Adcy2	2.92062	0.00994452
St3gal2	-0.70825	0.0099593
Kif6	4.14555	0.00998187
Igsf6	-1.61149	0.00998248
Siah1a	0.576725	0.0099953
Tlcd2	-1.22185	0.0100134
Zfp386	0.548787	0.0100554
Gng4	2.81471	0.0100649
Mak	4.88352	0.0101476
Fzd10	3.27691	0.0101476
Ribc2	6.5257	0.0101502
Ephb6	0.944248	0.0101704
Dse	-0.93011	0.0102895
Hoxd4	1.04926	0.0102895
Lzts3	1.58673	0.0103211
Tmem184a	3.54899	0.0103733
Klhl13	-0.916882	0.0103843
A930013F10Rik	-1.21566	0.0104166
Myh15	-3.10864	0.0104168
Utrn	-0.773378	0.0105036
Dcdc2a	7.12091	0.0105036
Hrasls	3.89521	0.0105036
Eps8l3	5.16196	0.0105036
1190005I06Rik	1.12595	0.0105452
Rab3gap2	-0.537202	0.0106451
1700086L19Rik	6.60459	0.0107027
Fads3	-0.81924	0.0107027
Rtdr1	6.93307	0.0108238
Cetn4	1.69831	0.0108565
Dcbld2	-0.734065	0.0109571
Gyk	1.71779	0.0109571
Nrg1	3.82756	0.0109764
Ccnd1	1.06961	0.0109967
Mycbpap	3.59157	0.0110191
Prkca	-0.694697	0.0110191
Ampd3	-0.875853	0.0110191
T2	5.46044	0.0110761
Gas7	-1.20966	0.0111147
Naip2	-1.45806	0.0111708
Pifo	5.94319	0.0111708
Clec4a1	-1.54124	0.0111708
Abca6	-1.37895	0.0112005
Vim	-0.640049	0.011216
Cd180	-1.8978	0.0112756
Stap1	-1.99671	0.0112756
Crhr2	3.25122	0.0114144
Ccdc17	1.77624	0.0114456
Hoxb7	1.11288	0.0114659
Gm5424	1.50219	0.0114659
Peg3	-1.21352	0.0114659
1190002N15Rik	0.703616	0.0114659
Ass1	1.50219	0.0114891
Als2cr12	0.799652	0.0116166
Tmem174	6.8395	0.0116166
Nlrp6	6.1783	0.0116166
Ttc29	6.09685	0.0116539
Tmem132c	2.98157	0.0116854
Epb4.1l1	-0.685752	0.0117015
Cep350	-0.637578	0.0117732
Epn3	2.14047	0.0117732
Serpinf1	-0.809821	0.0117877
Tmem232	6.33518	0.0117877
BC021891	3.67595	0.0118101
Catip	2.72606	0.0118227
Ccnjl	2.28546	0.0118227
Aldoc	2.06222	0.0118227
Larp4b	-0.655576	0.0118227
Lcp1	-1.45123	0.0118227
Mcfd2	-0.511216	0.0118227
Slc27a6	-2.18746	0.0118227
Mrc1	-1.39334	0.0118227
Hook1	1.68622	0.0118227
Dmkn	3.11717	0.0118227
Ush1c	6.69849	0.0118227
Gprasp2	3.26162	0.0118227
Ccdc170	2.18649	0.0118339
Runx2	-1.77088	0.0118339
1810020O05Rik	5.88808	0.0118339
Ccdc103	4.07188	0.0118544
Hpse	-1.63376	0.0118633
Lss	-1.01172	0.0118781
Wdfy1	-1.19629	0.0119561
Rnf186	6.97537	0.0119561
Phka2	-0.62673	0.0119561
Inhbb	-0.872602	0.0119609
Smim24	2.19038	0.011967
Gnptab	-0.719029	0.011967
Car9	2.22299	0.011967
Cdr2	-0.935535	0.011967
Nwd1	3.50067	0.0120131
Mst1r	-0.895747	0.012044
Mreg	1.32838	0.0120626
Zfp653	0.779242	0.0120626
Fcna	-1.74295	0.0120893
Tcf24	3.10663	0.0122788
Prelp	-1.24751	0.0123086
Stab1	-0.918445	0.012441
Pirb	-1.42885	0.0124711
Mapt	1.72008	0.0124753
Dydc1	6.80119	0.012507
Ubxn11	2.75665	0.0125723
Clec7a	-1.34752	0.0126079
Gm5549	6.12757	0.0126201
Arhgap9	-1.21696	0.012625
Lrrk2	-0.616115	0.0126597
Aire	5.76466	0.0127121
Cacnb1	1.16	0.0127363
Myo7b	4.15406	0.0127363
Prkcz	1.7316	0.0127363
Etfb	0.618066	0.0127363
Map3k3	-0.531686	0.0127428
H2-Q2	4.00913	0.0127803
Ctsd	-0.665731	0.0127803
Col6a2	-0.928922	0.0128153
Nol4	6.391	0.0128153
Adamts2	-0.930669	0.0129104
Cep128	-0.778662	0.0129104
Gm20554	3.65386	0.0129104
Rims4	-1.51667	0.0129104
Timm8a1	0.631799	0.0129104
Hmgb3	0.532573	0.0129315
Sigmar1	-0.57246	0.0129405
Lum	-0.771299	0.0129839
Ttc39a	2.60811	0.0130235
Trhde	-1.09689	0.0130412
F13a1	-1.49984	0.0130412
Arhgap24	-0.644303	0.0131142
Gm266	2.33178	0.0132565
Dlgap1	3.26463	0.0132565
Gars	0.457373	0.0132565
Gmnc	4.3066	0.0132879
Rest	-0.832929	0.0133115
Gm6792	6.5667	0.0133115
Chrm1	3.89056	0.013431
Heph	-0.654593	0.0134508
Fastkd2	0.531907	0.0135591
Lhx1os	6.70093	0.0135591
Ttc18	3.53946	0.0135591
Etl4	0.708961	0.0135591
Spag8	2.92313	0.0135591
2900026A02Rik	0.635388	0.0135591
Ndufv2	0.541336	0.0135651
Nhlrc4	6.1801	0.0136251
Serinc2	3.58569	0.0137006
Ccdc108	7.23882	0.0137035
A530050N04Rik	3.55298	0.0137035
Ccdc11	3.12501	0.0137035
Rgl3	0.788862	0.0137035
Svil	-0.541445	0.0139119
Mkx	4.89914	0.0139119
Tomm40	0.610726	0.0139119
Pld4	-1.07798	0.0139594
Nfam1	-1.38466	0.0139594
Ndufa11	0.576129	0.0139594
Zim1	-2.08691	0.0140103
Mgl2	-0.799152	0.0140285
Psmb5	0.518365	0.0141219
Hipk2	-1.46369	0.0142534
5330413P13Rik	6.16542	0.0143558
S100a13	0.646722	0.0143558
Pvrl2	0.581552	0.0143558
Il1rl1	-1.23914	0.0143739
2610528J11Rik	5.19835	0.0143739
Cldn22	-1.744	0.0143747
Tep1	-0.536724	0.0143937
Rab25	4.39181	0.0144698
Ptpn6	-1.09311	0.0145137
Adamts5	-1.00412	0.0145683
C3ar1	-1.94408	0.0146195
Cpz	1.44262	0.0146702
Chp1	-0.640484	0.0146962
Cxcl17	6.21307	0.0147392
Ptchd1	-1.86463	0.0147676
Atl3	-0.651932	0.0149465
Ndufa8	0.519325	0.0149776
Defb36	6.36402	0.0149776
Camk2b	1.57141	0.014987
Itgb2	-1.37201	0.0150047
Gm12695	5.87648	0.0150124
Nek11	4.32819	0.0150467
Arpc1b	-0.48593	0.0150918
Thsd7a	-0.8067	0.0150918
Eya3	-0.528554	0.0151464
Gm11992	2.48193	0.0151504
AF251705	-2.03763	0.0151839
Elovl5	0.518189	0.015204
Pdzd3	4.18771	0.0152765
Itga6	-0.654159	0.0153532
Clec12a	-1.54274	0.0153532
Ttc36	4.13548	0.0153564
Syne3	-0.953761	0.0154084
Sowaha	3.53293	0.0154168
Serpina3c	-0.889194	0.015501
Ston1	-0.872339	0.0155302
Snx5	-0.576901	0.0155302
Fam43a	0.766279	0.0155408
Pkp3	2.58052	0.0155675
Ddo	0.72756	0.0155917
Zcchc12	6.14256	0.0155917
Ankrd45	5.32821	0.0155953
Pik3r5	-1.26452	0.0155953
Letmd1	0.584323	0.0155953
2510049J12Rik	5.21396	0.0155953
Dnajc13	-0.551796	0.0155953
Brinp2	4.95497	0.0155981
Ano9	4.0624	0.0155981
Chkb	0.56276	0.0156241
Sorbs2	0.747254	0.0157545
Gm11710	-2.22044	0.0158082
Tmem55b	-0.489036	0.0158082
Kif13b	-0.773529	0.0158272
Gm11711	-2.22041	0.0158283
Ttc16	2.9918	0.0159171
Inadl	1.56164	0.0159353
Pcx	-0.81579	0.0159387
Rimklb	2.87555	0.0159387
Bco2	1.72371	0.0159387
Aadat	5.76007	0.015947
Ecsit	0.494424	0.0159488
Rab6b	0.85416	0.016097
Cpxm2	0.958887	0.0161656
Sla	-1.06039	0.016234
Trub2	-0.644329	0.0163083
Rassf4	-0.769979	0.0163401
Tspan33	2.22291	0.0163579
BC068157	2.21402	0.0163579
Dapk1	-0.686887	0.0164317
Mgam	3.38622	0.0164939
Tekt2	1.51146	0.0165083
Fads2	1.4163	0.016601
Tcp11	4.45673	0.0166607
Ngfrap1	1.53314	0.0166607
Erich3	4.69462	0.0166985
Sec24b	-0.588371	0.0167055
Ccnt1	-0.851767	0.0167938
Syt10	5.24459	0.0168128
Serpina3b	-2.33874	0.0169015
Uprt	-1.35247	0.0169272
Cmtm8	1.71537	0.0170275
Pacsin1	3.02473	0.0171721
Zfp474	5.45365	0.0171906
Mab21l2	2.63923	0.0172678
Proz	5.13998	0.0172678
Aoah	-1.24967	0.0172806
Rfk	0.41496	0.0173667
Ankfn1	5.61613	0.0173701
Lrp12	-0.801459	0.0173701
A1cf	5.43576	0.0173701
Mafb	-1.06191	0.0173701
Pdzk1ip1	4.65104	0.0173701
Crip2	0.898346	0.0175348
Naip6	-1.28164	0.0175348
Plekhg4	2.52711	0.0175348
Lrch3	-0.636118	0.0175495
Inpp5d	-0.827147	0.017567
Erbb3	2.39565	0.0176288
Tmc4	1.70831	0.0176288
Ivns1abp	1.0526	0.0177642
Lsr	1.4673	0.0177642
Fxyd3	2.38017	0.0177642
Lrrc6	6.1829	0.0177844
Ppp2r2b	3.07259	0.0177844
Man2a2	-0.501367	0.0178665
Ccdc158	3.05269	0.0178757
Cd53	-1.2335	0.0179633
Fkbp15	-0.502623	0.0179633
Synm	0.948157	0.0179633
Nfatc3	-0.562481	0.0179633
Fzd4	-0.796495	0.0182423
Evi2a	-1.53338	0.0182754
Aff4	-0.595061	0.0182817
Cox6c	0.671525	0.0182887
Fam178a	-0.659262	0.0182887
Gm10636	5.03189	0.0182972
Ahnak	-0.783776	0.0183295
Ngp	-6.83642	0.0184187
Clec4a3	-1.50398	0.0186098
Cd300ld	-1.40224	0.0186618
Ttpal	-0.597368	0.0186618
Mrps36	0.595707	0.0186898
Hadha	0.663739	0.0186898
Psd4	-1.21012	0.018696
Folr2	-1.84862	0.018696
Lyrm7	0.670689	0.0187398
Rec8	4.15808	0.0187398
Erich4	3.42733	0.0187398
Keg1	6.30879	0.0187839
Cd48	-1.33013	0.0188836
Cish	2.11374	0.0188949
Pgf	1.7732	0.0189996
1700019L03Rik	4.62605	0.0190403
Atp8b3	5.33336	0.0190619
Ppif	0.598908	0.0191481
Gpt	-0.681695	0.0191481
Met	-0.621259	0.0191481
Lrrc43	6.48422	0.0191612
Cdc40	-0.575123	0.0191613
Amacr	0.603886	0.0191809
Ptgfr	-2.18405	0.0192138
Arhgap30	-1.04089	0.0192802
Naip7	-1.43044	0.0192802
Rragd	2.63291	0.0192802
Adora1	-0.816241	0.0193098
Ghr	-0.72788	0.0193098
Fndc3b	-0.706894	0.0193098
Mki67	-1.27108	0.0193143
9530077C05Rik	2.61331	0.0193143
Ddx39	0.67225	0.0193228
AI854703	2.8382	0.0194064
Ppp2r5b	-0.754957	0.0194351
Prrg4	2.86724	0.0194351
Aff1	-0.788363	0.0194351
Smarca1	1.28438	0.0194351
Cd200	0.592358	0.0194439
Cbr1	0.485118	0.0194439
Adra2a	1.57773	0.0194912
Ccdc96	2.2016	0.0195986
Kcnh8	4.65708	0.0197851
C5ar1	-1.80699	0.0197851
Pnkd	0.518977	0.020126
Unc93b1	-0.729075	0.0201404
Strbp	0.684487	0.020391
Tuba1a	-0.995126	0.0204217
Dbpht2	5.15086	0.0206367
Ncf1	-1.03182	0.0206367
Gpm6b	-0.759362	0.0206871
Ptprc	-1.11412	0.0207689
Ncmap	3.5149	0.0208207
2610028E06Rik	-3.13704	0.0208813
Slain1	2.6122	0.0208948
2310030G06Rik	1.79381	0.0209297
Mtcl1	1.91955	0.021107
Camk2n1	1.2119	0.0211593
Mapk10	3.47229	0.0212462
Cyth4	-1.16723	0.0212841
Sfta2	6.43984	0.0213782
C5ar2	-2.25342	0.0213782
Wbp5	0.719228	0.0213782
Ulk4	2.20088	0.0214648
Chrna2	2.47778	0.0214787
Vwa2	5.94113	0.0214787
Irf6	1.93803	0.0215284
Cox17	0.698286	0.0215284
Mif	0.792229	0.0215701
Galnt14	4.35921	0.0215701
Ncf2	-1.20782	0.0215955
Rplp2-ps1	1.23036	0.0215955
Apcdd1	-0.971158	0.0215955
Kcnq4	-1.11717	0.0215955
Arl4c	1.46982	0.0216252
Slc5a9	5.51043	0.0216252
Ripk4	2.09841	0.0216661
Cyp2d26	4.52376	0.0217476
Midn	0.587852	0.0217713
Kif1b	-0.639716	0.0217723
Muc15	5.71469	0.0218957
Gm1966	-1.28449	0.0218957
Ndufb10	0.574974	0.0219345
Ndufa12	0.538148	0.0220051
Mrpl30	0.495156	0.0220547
Fcer1g	-1.20967	0.0220558
Rassf3	-0.696643	0.0221084
Dtx3	0.591731	0.0221084
Synj1	-0.576584	0.0221084
Uba6	-0.717101	0.0221084
Slc6a20b	6.23026	0.0221084
Lrrc36	2.01031	0.0221209
Plcd4	3.59045	0.0221361
Xdh	-0.64403	0.0222083
Smc4	-0.662294	0.0222871
Htra4	1.2219	0.02249
Atp2b4	-0.697903	0.0224921
Sntb1	-1.04936	0.0225428
Htra3	-0.745515	0.0225428
Tmem176b	0.778234	0.0225428
Siglec1	-1.52845	0.0225624
Itgb6	6.05869	0.0226256
Gad1	4.28877	0.0226585
0610005C13Rik	3.78302	0.0226585
2010016I18Rik	-1.49469	0.0226635
Xlr	-1.37939	0.0226635
Fmod	0.987832	0.0228777
Tm4sf19	-2.95054	0.0228924
Arhgdig	2.63112	0.0228984
Glyat	6.55484	0.0229747
Zmiz1	-0.632142	0.0230276
Gm3448	2.01007	0.0230276
Gm3417	2.01007	0.0230276
Wdfy2	-1.20196	0.0230442
Kif14	-1.48102	0.0231353
Ano5	4.97723	0.0231467
Adam23	-0.812359	0.0233143
LOC102631757	5.84361	0.0233568
Slirp	0.550978	0.0233692
Vcan	-1.09475	0.023407
Emilin2	-1.51439	0.0235127
Lrmp	-0.919142	0.0235127
Ctss	-1.53714	0.0235227
Hydin	2.64947	0.0235295
Gli1	1.60785	0.0236336
Hpn	2.66927	0.0236528
Bche	-0.686158	0.0237707
Dpy19l4	-0.743061	0.0237707
Cckbr	5.44843	0.0238147
Slc23a1	2.66001	0.0238613
Lrriq1	3.65091	0.0238865
Gm12657	2.87677	0.0238865
Themis2	-1.06458	0.0238996
Emr4	-1.52173	0.023926
Ccdc147	5.73588	0.0239612
Kcnk3	0.810229	0.0239905
Rerg	2.24716	0.0239927
Gdap1l1	3.91022	0.0240263
Cideb	2.55678	0.0240421
Lef1	3.05592	0.0240573
Rnf125	-0.754216	0.0242133
Ccl4	-2.39632	0.0242743
Matn2	-0.703956	0.0244081
Wdr38	5.94255	0.0244081
Bpi	4.73724	0.0244624
Tnfaip8l2	-1.15414	0.0245128
Emb	-1.16747	0.0246277
Prob1	1.83809	0.0247064
Grb7	2.69929	0.0247233
Agbl4	5.95256	0.0247331
Trim7	2.2582	0.0247615
Slc37a2	-2.00044	0.0247615
Tmem30b	2.83586	0.0247622
Litaf	-0.59536	0.0248339
Rab8b	-0.787442	0.0248914
Dhrs13	1.16771	0.0249215
Asap1	-0.531334	0.0250163
Ccdc155	5.05423	0.0250524
Ppm1j	1.25022	0.0252095
E130006D01Rik	5.33135	0.0252843
Slc6a19	2.90316	0.0253199
Timm10	0.596915	0.0253199
Ptpro	-1.45545	0.0253199
Zcchc18	2.70924	0.025398
Trim56	-0.92589	0.0254047
Rnd3	-0.832841	0.0255727
Slc25a33	0.852171	0.0256597
Bag2	0.881944	0.0257198
Evi2a-evi2b	-1.23946	0.0257543
Angptl2	-0.717572	0.0257543
2010300C02Rik	1.7547	0.0258604
Mroh2a	1.30312	0.0259637
Pkhd1	5.56976	0.025967
Ebf4	1.70262	0.025967
Dennd4b	-0.630066	0.025967
Ildr1	3.6482	0.0259706
Jmjd7-pla2g4b	-0.705537	0.025995
Efcab12	2.41628	0.025995
Hgf	-1.20487	0.026016
Tcf20	-0.500941	0.0260451
Ehhadh	0.973839	0.0261062
2300002M23Rik	5.67287	0.0261062
Ntng1	2.15676	0.0261062
Rap1gap	1.5729	0.0261062
Ccdc181	0.961772	0.0261071
Fam84a	1.38131	0.0261557
Gm609	3.14938	0.0261557
2900092D14Rik	4.43286	0.0262766
Apc	-0.543455	0.0264594
Arrdc3	-0.872669	0.0265809
Pclo	-1.08017	0.0265809
Usp32	-0.555393	0.0266462
Cda	2.61088	0.0266809
Myo1g	-1.09412	0.0267199
Sgpp2	3.9183	0.0269208
Ttr	5.98029	0.0269208
Lpxn	-1.09101	0.0269208
Grb14	0.776415	0.0269208
Bmp3	-1.40085	0.0269208
Was	-1.02894	0.0269208
Tnpo1	-0.507403	0.0269931
Ndufb4	0.578748	0.027041
Chrna10	4.57802	0.027041
Nav1	-0.538795	0.0271068
Adap2	-0.883861	0.0271068
Insl3	1.15885	0.0271068
Pou6f1	0.550923	0.0273772
Serpinb1b	3.67129	0.0274126
4931408D14Rik	-0.695707	0.0274126
Kif9	1.9058	0.0274126
Lrrc25	-1.44913	0.0274165
Papss2	0.620972	0.0274551
Hoxd8	0.763078	0.0274551
Suclg1	0.539576	0.0274551
Gm15816	4.55613	0.0274551
1700018A04Rik	6.22927	0.0274716
Evpl	1.67938	0.0274869
Mchr1	4.33492	0.0274869
Abcg8	2.07051	0.0274869
Efcab10	5.09734	0.0275287
Hspe1	0.566505	0.0275424
Ugt8a	4.78906	0.0275425
Cav1	-0.659865	0.0275425
Arhgdia	-0.487918	0.0275577
Ptch1	-0.828154	0.0276007
Phc3	-0.54381	0.0276479
Fam184a	1.5342	0.0276646
Pacrg	2.65916	0.0277022
Uckl1os	5.96962	0.0277022
Ptk7	1.46131	0.0277249
Cspg4	-0.625241	0.0277858
Gcc2	-0.51131	0.0278738
Stc2	-0.882741	0.0280441
Gm5431	-1.60637	0.0280441
Itih5	-0.740975	0.0280573
Acaa2	0.535059	0.0280992
Wdr31	2.30136	0.0280992
Atp5h	0.515229	0.0282228
Ms4a7	-1.75527	0.0282228
Mex3a	0.973074	0.0282228
Amn	5.21132	0.0282552
Dusp14	2.09801	0.0282992
Mrps16	0.525931	0.0282992
Ttc3	-0.489979	0.028303
Bmpr1b	2.363	0.028303
Wscd2	-1.1694	0.028303
4833427G06Rik	4.68492	0.028303
Zfp827	0.997965	0.0286926
Il1rl2	-1.6014	0.0287231
Acoxl	-1.5346	0.0288791
Lrrc51	1.22104	0.0289552
Ubd	1.96734	0.0290114
Hdc	1.81341	0.0290453
Gm1987	1.42941	0.0290453
Ccl21a	1.42941	0.0290453
Mfsd12	-0.977172	0.0292019
Adam19	-0.884626	0.0292547
Ccdc3	0.613281	0.0293944
Sdhaf1	0.526334	0.0294448
Rnf214	-0.581656	0.02973
Armc2	2.38903	0.0297396
Mrpl18	0.452485	0.0297654
C4bp	5.31645	0.0297958
Trim31	5.6894	0.0297958
Fam73a	0.872857	0.0297958
Tomm5	0.55973	0.0300796
Eea1	-0.605166	0.0301255
Hmbox1	-0.793577	0.0301255
Chchd2	0.651083	0.0301255
Art5	4.43756	0.0301255
Snx30	-0.585856	0.0302085
Apol10a	4.06349	0.0302403
Elof1	0.58543	0.030344
Sgcd	-0.7075	0.0303536
Dab1	3.22464	0.0303536
Ctsb	-0.612373	0.0304748
Rnf183	4.37247	0.0305333
Mtmr6	-0.529641	0.0305628
Fermt3	-1.02344	0.0307903
Sqrdl	-0.491789	0.0307931
Acyp1	0.553181	0.0308093
Got1l1	2.07689	0.0308093
Apba1	-1.01932	0.0311118
Tmc5	1.61637	0.0311764
Krt19	2.06869	0.0311849
Tnmd	3.45721	0.0312467
Atp4a	4.68568	0.0313576
Susd2	0.94886	0.031533
Ttc37	-0.65775	0.031533
Lhfpl2	-1.2197	0.031533
Cpe	0.802776	0.0316054
Chia1	6.18029	0.0316283
Npnt	1.32802	0.0316283
Cep85l	-1.06183	0.0317986
Smim22	4.4895	0.0319802
Slc26a9	3.89778	0.0320428
Col4a1	-0.685117	0.0320428
Foxn2	-0.570899	0.0321513
Stra6	2.56248	0.0321513
Scn4a	3.49326	0.0322427
Kcnmb4	3.53116	0.03227
Ndufs7	0.623416	0.0322793
Gm7457	5.35592	0.0322793
Spsb4	3.6987	0.0322793
Spock1	2.38844	0.0322886
Syngap1	1.10454	0.0323132
Arrb2	-0.671377	0.0323345
Wdr72	4.28127	0.0324958
Dner	3.51408	0.0326089
Wnt7b	3.79473	0.0326787
Wdr89	1.11088	0.0327207
Marcksl1-ps4	5.37593	0.0327207
Clu	0.83536	0.0327745
Plet1os	2.02046	0.0327745
Serinc3	-0.655425	0.0329827
Ston2	1.23665	0.0332708
Xpo4	-0.94623	0.0332708
Svopl	1.90114	0.0332708
Hoxa4	0.721734	0.0332708
Wfdc2	3.72	0.0333602
5430435G22Rik	-1.35389	0.0333619
Fam184b	4.28165	0.0333829
Esrp2	1.91469	0.0333829
Usp43	1.32265	0.033404
Cd300lb	-2.15719	0.033404
Disp2	1.11705	0.033404
Abcg3	-1.0329	0.0334627
Mtx1	0.447962	0.033466
Map9	-0.901537	0.0334824
Tspan13	0.499105	0.0334876
Golga3	-0.609528	0.033601
Ulk2	-0.517378	0.0337904
Endog	1.00457	0.0337904
Slc36a4	-1.02893	0.0337904
Cacng7	-1.16159	0.0338401
Ctxn3	5.07168	0.0341057
Mphosph6	0.552636	0.034117
1700101E01Rik	4.45556	0.0342068
Hook3	-0.544721	0.0342068
Muc5b	4.95403	0.0342232
Dst	-0.685266	0.034229
Mrpl51	0.441126	0.0344018
AK129341	1.57871	0.0344018
Gm53	4.1995	0.0347678
Myoc	2.48752	0.0348958
Rab32	-0.668353	0.0349305
Cplx2	0.903457	0.035012
Casc5	-1.60355	0.035012
Dos	1.42011	0.0350542
Csrp2	0.779479	0.0350542
Gpr183	-1.58151	0.0351458
Bod1l	-0.600039	0.0351458
Tbata	2.65372	0.0351774
Extl3	-0.539308	0.0352641
Rtn4r	4.51848	0.0352641
Slit3	-0.815024	0.0354204
Stk24	-0.471001	0.0355337
Tmem50b	-0.435563	0.0355337
Ccdc74a	2.58768	0.0355386
Kit	1.28567	0.0355386
1810041L15Rik	3.75131	0.0355503
Dzip1l	1.51328	0.0358202
Wfdc16	5.58735	0.0358846
Lrp6	-0.643589	0.0360489
Fbxl20	-0.50758	0.0360524
Mycbp2	-0.632993	0.0360567
Etnk2	3.88831	0.0361858
Naalad2	-0.688626	0.0361956
Mrpl35	0.403666	0.0363351
Rgs10	-0.876411	0.0363381
Abcc4	0.477597	0.0363417
Myo1h	1.69662	0.0363435
Alcam	-0.957818	0.0364894
Pcdh19	-0.893901	0.0365321
Rbms3	-0.606786	0.0369719
Cd209a	-1.19591	0.0370216
Mylip	0.505241	0.0370335
4933407L21Rik	5.65911	0.0372242
Ccdc92	1.46832	0.0372563
Tpr	-0.559285	0.0373168
Samd10	1.31002	0.0373168
Elmod1	2.51488	0.0374549
Sdc3	-0.604416	0.0375036
Plscr1	1.30733	0.0375188
Ccdc150	2.95943	0.0375957
Hmmr	-1.26309	0.0375957
Pear1	0.598471	0.0375957
Atp13a2	-0.61484	0.0375957
4932438H23Rik	2.12199	0.0376012
Esrp1	3.00925	0.0376012
Srpx2	-1.1775	0.0376012
Sort1	-0.582165	0.0376588
Thsd4	1.12688	0.0376588
Evi2b	-1.16462	0.0376924
Ccser2	-0.655836	0.037776
Atp13a4	5.70424	0.037776
1700007K13Rik	3.49755	0.0378698
A530016L24Rik	-0.856358	0.0379444
Emg1	0.553381	0.0380866
Hoxb3	1.04442	0.0382673
Tifab	-1.16871	0.038439
Dync2li1	0.801759	0.038439
Dnah7a	4.28978	0.0384442
Rnd2	0.832	0.0384442
Fam107b	0.585951	0.0385133
Megf6	1.12691	0.0385133
Baiap2l1	1.27466	0.0385133
Aff2	-2.15077	0.0385133
Zfp612	0.704746	0.0387084
Edn3	4.3015	0.0387698
9530053A07Rik	5.28659	0.0387931
Uqcrb	0.545188	0.0390258
Rasl10b	1.56252	0.0390412
Shprh	-0.617228	0.0390576
Rpgr	0.740213	0.0391457
Atrnl1	-0.543571	0.0391472
Bbx	-0.531443	0.0392478
Fbp1	3.96388	0.0394832
Spata13	0.674103	0.039601
Stox1	1.75463	0.0397287
Rnf144b	-1.16085	0.0397287
H2-Q1	3.75989	0.0397287
Arhgef19	1.98422	0.0399774
Scml4	2.74437	0.0402313
Mep1a	6.23784	0.0402313
Ldlrad2	4.9701	0.0403234
Nomo1	-0.53091	0.0404465
Tnfrsf19	1.83457	0.0407656
Ppp1r32	2.47488	0.0407656
Pi4k2a	-0.406396	0.0407734
Il17rd	0.721954	0.0408528
Gm5086	-2.00764	0.0411166
B930041F14Rik	1.23929	0.041117
Scg5	2.35093	0.0412028
Plscr2	1.41358	0.0412721
Got1	0.818456	0.0413428
Cd68	-1.52993	0.0414968
Nlrp9b	5.33517	0.0417364
Ttll4	-0.70229	0.0419777
Igfbp3	0.691896	0.0419777
Barhl1	5.21446	0.0419777
Mmp3	1.93794	0.0419777
Zfp369	-1.07205	0.0419791
1700021F05Rik	0.497632	0.0420372
Ehd2	-0.554459	0.0421182
Zfp318	-0.485551	0.0422235
Mustn1	-0.718959	0.0422616
Glis2	0.911822	0.0422876
C920009B18Rik	-2.19488	0.0423639
G6pdx	-0.697157	0.0424201
Fam134b	1.3321	0.0424485
Gm5531	4.14516	0.04262
Rbm46	-1.37335	0.0426224
Gpr34	-1.12522	0.0426297
Ripply3	-1.05666	0.0427555
Pdlim3	1.71484	0.0428522
Akap14	4.8198	0.0428522
Gpc1	-0.719233	0.0429007
Sh3glb2	-0.457203	0.0429007
Col4a2	-0.681563	0.0430058
BC051142	1.51547	0.0433735
Cd82	0.812887	0.0433735
Sp5	4.1857	0.0435776
Cd40	-1.13676	0.04373
Bai2	1.672	0.0437394
Asb11	3.46379	0.0437394
Mertk	-0.729456	0.0438658
Tm2d3	0.489575	0.0440115
Snx29	-0.941049	0.0440245
5031425F14Rik	-2.60935	0.0440245
Clec4b2	-4.53037	0.0440245
Foxn3	-0.772889	0.0440857
Slc25a18	3.27556	0.0441295
Prrc2c	-0.547418	0.0442028
Prm2	4.84843	0.0442028
Ebi3	-1.33221	0.0442028
Dennd2d	-0.848277	0.0442028
Cox4i1	0.528048	0.0442028
D430036J16Rik	5.11552	0.0442028
Ptx4	4.81342	0.0442417
Phldb3	1.39237	0.0442417
1110004E09Rik	0.540608	0.0444643
Atp5sl	0.530165	0.0444643
Ankrd11	-0.532229	0.0444902
Fuom	0.599802	0.0445191
Jmjd7	-0.748117	0.0445994
Ndufc1	0.573278	0.0445994
Npy2r	4.36768	0.0445994
Arhgap25	-0.727657	0.0445994
8430426J06Rik	2.36833	0.0447713
Ankmy1	2.82661	0.0447989
Cyfip2	1.13891	0.0447989
Elovl7	1.66513	0.0447989
Dnajc15	0.483223	0.0449022
Rbm38	0.797134	0.0450093
Morn4	1.23661	0.0450555
Klb	-0.727126	0.0450555
Gm8787	5.29918	0.0450555
Col4a3	1.45847	0.0451607
Gm9696	-1.44865	0.0452046
Efhb	2.81839	0.0452566
AI118078	1.59439	0.045287
Psme2b	-1.0599	0.0453489
Rnf208	1.80221	0.0453489
Tyrobp	-1.20241	0.0454366
Aldh1a7	-0.875615	0.0454432
Grem1	2.22664	0.0454708
Tesc	2.00815	0.0454941
Acap2	-0.523118	0.0455633
Fam214b	-0.483515	0.0457012
Frem3	4.92962	0.0457012
Clec2i	-1.23812	0.0457597
Rogdi	0.758114	0.0458241
Cacna2d3	2.55869	0.0458294
Slc14a1	-1.17936	0.0458294
Lhb	5.79722	0.0458294
Insig2	-0.446082	0.045848
Ankrd66	3.49378	0.045848
Loxl1	-0.799131	0.045848
Wdr26	-0.484819	0.0458587
Nkx6-2	4.5928	0.0458587
Msx3	5.55304	0.0458587
Mvd	-0.876688	0.0459251
Lama2	-0.851636	0.0461441
Atad2	-0.658172	0.0461647
Phf20	-0.455356	0.0461694
Parm1	-1.12936	0.0461845
Fgd3	-1.35129	0.04622
6430584L05Rik	2.67506	0.04622
Ctdspl	-0.596465	0.04622
Krt7	1.49188	0.0462482
Ncoa1	-0.576203	0.0465295
Shisa6	-1.20597	0.0465333
Tmem98	0.562823	0.0465333
Card11	-1.28265	0.0465333
Ahcyl2	-0.601141	0.0465333
Ube4a	-0.436443	0.0465333
Pcp4l1	1.43332	0.0465424
Hnrnph3	0.447729	0.0465725
Il6ra	-0.888318	0.0465725
Timm8b	0.439724	0.0465725
1300002E11Rik	0.482455	0.0469681
Eva1a	1.62646	0.0469715
Cyp2d9	5.22381	0.0470497
Cldn6	4.71273	0.0470497
Slc6a4	1.4125	0.0470777
Dnah7b	1.92853	0.0472327
Daw1	4.43235	0.0472327
Cd59a	-0.588577	0.0472327
Ifnlr1	1.86622	0.0472461
Abo	5.44207	0.0474825
Mfrp	1.47467	0.0474956
C1qtnf5	1.47467	0.0474956
Nrxn2	1.41357	0.0476805
Fank1	2.86426	0.0476805
Ankrd12	-0.68632	0.0478287
Rnf7	0.400465	0.0478287
Cdca3	-1.06221	0.0478795
Dysf	0.503268	0.0478992
Nespas	-3.54478	0.0479377
Chpf2	-0.462657	0.0479377
Efr3a	-0.446586	0.0480359
Slc11a1	-1.26083	0.0480764
Ncoa2	-0.449002	0.0481001
Il1b	-3.22065	0.0481001
Mmp9	-1.44842	0.0481001
C030023E24Rik	5.1982	0.0481001
42984	-0.73697	0.0482977
Vnn3	-0.698801	0.0483289
Fancm	-0.577515	0.0485798
Myo6	0.726275	0.0485798
Ophn1	-0.653937	0.0486264
Mrps23	0.412104	0.0486684
Aatk	0.811186	0.0486684
Lrrc18	2.11254	0.0486684
Armc3	3.46556	0.0486684
Minos1	0.584305	0.0487213
Abcg1	0.742354	0.0488016
Gpr65	-1.23866	0.0488455
Igsf8	-0.458553	0.0488678
Amer1	-0.685037	0.0489407
Ms4a6d	-1.67007	0.0489509
Ndufs6	0.529131	0.0491162
Pbrm1	-0.47484	0.0492359
Ncald	1.27533	0.0492359
Corin	3.99684	0.0492359
Man2a1	-0.555629	0.0493054
Spef1	0.997541	0.0493129
Best3	4.24945	0.0493812
Mat1a	5.20532	0.0493812
Ermp1	-0.565908	0.0493995
Spi1	-1.33143	0.0493995
C330021F23Rik	4.21309	0.0495424
Sh3bp5	0.546335	0.0497228
Adora3	1.93536	0.0498736
Mob1a	-0.606339	0.0498736
Clcn5	-1.08828	0.0498753
Prex1	-0.683697	0.0500322
