# Supplementary material for: Directing visceral white adipocyte precursors to a thermogenic adipocyte fate improves insulin sensitivity in obese mice
Source: eLife. 2017 Jul 19;6:e27669. doi: 10.7554/eLife.27669 (PMC5552276; doi:10.7554/eLife.27669)
Supplement: Figure 4—source data 2. — DOI: http://dx.doi.org/10.7554/eLife.27669.009 [file elife-27669-fig4-data2.xlsx]

## Sheet: Supplementary Table 2
Figure 4- source data 2: Genes whose expression is significantly altered in Inguinal WAT of CL316,243 treated mice
Gene Name	log FC (CL/Vehicle)	FDR
Elovl3	5.42703	6.24808e-32
Apoc2	3.35954	7.07585e-29
Gnao1	2.0587	2.07029e-25
Car14	4.78483	2.24155e-22
Apoo	1.65428	2.61424e-22
Poln	2.01103	3.8609e-22
Letmd1	1.79389	2.43528e-20
Pdhx	1.61223	4.47002e-20
Acaa1b	3.72283	1.37539e-19
Acaa2	1.72127	3.37846e-19
Letm1	1.69881	6.54809e-19
Aldh3b2	2.2766	8.66778e-19
Prdx3	1.39618	9.79872e-19
Sdhd	1.50548	2.18121e-18
Uqcrc2	1.54217	4.13326e-18
Lyrm5	1.45646	8.15586e-18
Pgam1	1.58263	1.66583e-17
Sucla2	1.77873	1.68121e-17
Dlst	1.60382	1.78758e-17
Apoo-ps	1.47327	2.49517e-17
Apoc4	5.26842	8.37923e-17
Rmdn1	1.57446	9.58715e-17
Acadvl	1.60569	2.49376e-16
Lace1	1.4115	2.57615e-16
Alpl	1.79237	4.23197e-16
Ndufs3	1.36582	4.41959e-16
Ptcd3	1.35219	4.76759e-16
Khdrbs3	1.52655	7.04142e-16
Fahd1	1.47013	8.12095e-16
Mdh2	1.46913	8.52214e-16
Cycs	1.55515	9.09685e-16
Suclg1	1.54635	1.09484e-15
Uqcrfs1	1.53381	1.21714e-15
Dhrs7	1.8297	1.67496e-15
Ndufa9	1.24948	1.68342e-15
Hspa9	1.4462	2.93496e-15
Uqcrc1	1.43446	3.09013e-15
Cox7a1	2.67611	7.25015e-15
Cyc1	1.45327	7.51929e-15
Sod2	1.49495	1.09938e-14
Adck3	1.87293	1.09938e-14
Reep6	2.2991	1.71241e-14
Mtch2	1.38515	1.85392e-14
Coq9	1.34617	2.03798e-14
Pmm1	1.33058	2.57605e-14
Decr1	1.69453	4.02564e-14
Aifm1	1.2205	4.83749e-14
Phb	1.17384	5.58567e-14
Ndufb5	1.41705	1.04381e-13
Slc25a20	1.80614	1.04626e-13
Atpaf2	1.31547	1.26219e-13
Timm44	1.19231	1.31106e-13
Gfm1	1.35382	1.9125e-13
Acadl	1.73603	2.43005e-13
Asns	1.23564	3.83096e-13
Pafah2	1.67854	4.421e-13
Mrpl51	1.18331	4.69134e-13
Acadm	1.68427	4.76703e-13
Nnat	-5.00054	7.3927e-13
Grpel1	1.18643	7.79461e-13
Ndufv2	1.27178	1.00384e-12
Idh3b	1.3583	1.10029e-12
Etfa	1.26603	1.33456e-12
Idh3a	1.43401	1.42409e-12
Coq6	1.18906	1.63187e-12
Akr1b10	1.21898	1.72815e-12
Cox7b	1.4908	1.89543e-12
Uqcrb	1.45555	1.89763e-12
1700021F05Rik	1.33877	2.06492e-12
Usmg5	1.30076	2.06979e-12
Tmem14c	1.2229	2.23818e-12
Atp5j2	1.38976	3.34077e-12
Dld	1.45771	3.42172e-12
Hoxa4	1.95202	3.76358e-12
Ndufs8	1.2149	3.76358e-12
Mrps2	1.3153	3.92302e-12
Ndufc1	1.54375	4.03192e-12
Atp5f1	1.11796	4.85054e-12
Chchd3	1.20202	5.18454e-12
Atox1	1.13791	6.13233e-12
Coasy	1.25132	6.19996e-12
Clpx	1.26237	7.86098e-12
Ifi27	1.31066	8.83051e-12
Slc25a39	1.35247	1.0583e-11
Ppif	1.40744	1.0725e-11
Eci1	1.46345	1.22209e-11
Mrpl20	1.14313	1.2453e-11
Lipt1	1.41659	1.40207e-11
Pgk1	1.18023	1.6039e-11
Ecsit	1.11451	1.82698e-11
Etfdh	1.80539	1.83855e-11
Mrpl30	1.16722	1.84376e-11
Gm5512	1.1106	2.10693e-11
Rmnd1	1.11566	2.27778e-11
Atp5o	1.28081	2.28565e-11
Rmdn3	1.26473	2.49052e-11
Etfb	1.35532	2.55183e-11
Cox6b1	1.4126	2.76901e-11
Ptges2	1.15808	3.01922e-11
Aco2	1.52257	3.10808e-11
Acsf2	1.22041	3.17697e-11
Xrcc6	1.24964	3.20281e-11
Retsat	2.04424	3.44943e-11
Fmo1	1.31121	3.44943e-11
Hadh	1.38388	3.44943e-11
Minos1	1.52509	3.90683e-11
Ndufs2	1.14344	4.78742e-11
Immt	1.17126	5.20721e-11
Ndufa8	1.13378	6.62194e-11
Cs	1.3469	8.08066e-11
Fars2	1.11141	8.12887e-11
Ndufb6	1.74594	9.30334e-11
Cox7a2	1.27152	9.30334e-11
Ldhb	1.45756	9.30334e-11
Ndufa11	1.24177	9.81376e-11
Gsto1	1.16536	1.09215e-10
Ndufs5	1.41219	1.17067e-10
Fuom	1.51585	1.27483e-10
Tstd3	1.38003	1.27483e-10
Ndufs1	1.19875	1.30901e-10
BC002163	1.39317	1.35095e-10
Cox4i1	1.31087	1.44972e-10
Mrps36	1.30662	1.45655e-10
Zadh2	1.27993	1.46065e-10
Mtx2	0.934158	1.6564e-10
Mrpl1	1.08589	1.68586e-10
Lias	0.961015	1.91112e-10
Rbpms2	1.05942	1.96045e-10
Mrps22	1.22172	2.0324e-10
Afg3l2	1.01791	2.05016e-10
Ndufs4	1.10504	2.2201e-10
Mrps27	1.00915	2.59076e-10
Dnaja3	1.08705	2.69253e-10
Hsd17b12	1.3747	2.69393e-10
Atp5a1	1.21318	2.83515e-10
Rtn4ip1	1.12019	2.92048e-10
Sdhc	1.10426	3.85641e-10
Sdhb	1.24555	4.07045e-10
Hadha	1.4347	4.42063e-10
Abcb8	1.00593	4.74815e-10
Echs1	1.03118	4.99971e-10
Uqcrh	1.20676	5.08786e-10
Coq5	1.20966	5.36753e-10
Timm8b	1.06772	6.19646e-10
Fh1	1.07741	7.97608e-10
C7	-2.40696	9.25795e-10
Ndufa5	1.2708	9.6378e-10
Mdh1	1.13255	1.04199e-09
Apoc1	1.48849	1.18384e-09
Ndufb2	1.55742	1.22647e-09
2010003K11Rik	1.38057	1.46857e-09
Hadhb	1.1853	1.63187e-09
Gapdh	1.76083	1.70869e-09
Ghitm	1.04279	1.78368e-09
Mrps18b	0.986392	1.7849e-09
Atp5h	1.13126	1.94233e-09
Ogdh	1.31499	1.94639e-09
Pitpnm2os1	3.77604	1.96993e-09
Mrpl46	1.01607	2.02523e-09
Acsf3	0.992276	2.16775e-09
Atp5l	1.30301	2.3253e-09
Ndufs7	1.39317	2.39154e-09
Mrpl35	0.907616	2.74962e-09
Fndc5	2.54693	2.98791e-09
Hacl1	1.34297	3.02109e-09
Coq3	1.14707	3.21676e-09
Garnl3	1.5559	3.28439e-09
Cdc34	0.999373	3.60984e-09
Alad	1.01245	3.88095e-09
Dlat	1.51252	3.97988e-09
Ak1	1.77042	4.05378e-09
Mcee	1.07838	4.26897e-09
Mrps7	1.00778	4.39859e-09
Atp5d	1.35489	4.41223e-09
Nudt7	1.30497	4.41223e-09
Oplah	1.27976	4.46787e-09
Ndufb7	1.2298	4.46787e-09
BC004004	0.983443	5.00819e-09
Ndufb4	1.23314	5.10771e-09
Abhd6	1.05589	5.46837e-09
Bola3	1.28949	5.67559e-09
Ptms	1.12202	5.69786e-09
Tmem110	0.937492	6.14588e-09
Mrpl42	0.929157	6.56285e-09
Paox	1.05812	6.58e-09
Chchd2	1.40368	6.9229e-09
Ndufa12	1.10467	7.12198e-09
Smdt1	1.00596	7.12198e-09
Agl	1.51139	7.41057e-09
Gars	0.877468	8.81108e-09
Isca2	1.00429	9.01698e-09
Memo1	0.984415	9.47656e-09
Ndufv3	1.11027	9.83648e-09
Hist1h2bc	1.29006	9.83648e-09
Traf4	1.4376	9.83648e-09
Cdk2ap1	0.858143	9.91748e-09
Ndufc2	1.17754	1.01745e-08
Gpd1	1.73428	1.02028e-08
Slc16a1	1.40159	1.05609e-08
Cidea	1.45968	1.10196e-08
Mrpl12	1.44043	1.1514e-08
Cyb5b	1.5199	1.17378e-08
Mrpl27	0.969072	1.23273e-08
Tlcd2	2.31767	1.26178e-08
Txnrd2	1.03877	1.30606e-08
Tpi1	0.990496	1.30606e-08
Mrps35	0.970923	1.30759e-08
Atp5b	1.14989	1.32824e-08
Idh1	1.13665	1.47012e-08
Ndufa6	1.34272	1.49235e-08
Agpat3	1.07629	1.57155e-08
Lpcat3	1.17948	1.61432e-08
Pdk2	1.32013	1.65119e-08
Pex7	0.960969	1.73506e-08
Slc2a13	-2.40095	1.77933e-08
Dnajc15	1.06569	1.78865e-08
Alkbh3	0.849504	1.90864e-08
Dcaf6	1.039	1.9389e-08
Emc6	0.954856	1.94806e-08
Bmp8b	4.95187	1.9932e-08
Ldha	1.19704	2.03816e-08
Uqcc1	0.860824	2.30137e-08
2010107E04Rik	1.24526	2.50539e-08
Ppa2	0.898884	2.51517e-08
Ndufb10	1.14043	2.5513e-08
Ndufb9	1.19984	2.84323e-08
Tmem70	0.953133	2.87854e-08
Orm2	2.84153	3.05808e-08
Ak2	0.978813	3.1834e-08
Col10a1	5.82563	3.21694e-08
Glrx5	1.1188	3.25599e-08
Mpc2	1.55012	3.38624e-08
Cox15	0.882883	3.81055e-08
Apool	0.882357	3.89525e-08
Alas1	1.63643	3.96835e-08
Phospho1	1.44683	4.13056e-08
Timm23	0.973976	4.31716e-08
Cbr4	0.951926	4.35214e-08
Mrpl39	0.828611	4.35973e-08
Clybl	0.984449	4.35973e-08
Fabp5	1.59475	4.39494e-08
Gys2	1.96717	4.71884e-08
Hibch	1.05863	5.09314e-08
Ddo	1.3561	5.25987e-08
Coq7	1.07389	5.38335e-08
Fam210a	1.0277	5.48521e-08
Mest	-3.48161	5.53349e-08
Hspd1	1.12447	5.54162e-08
Ndufa4	1.0161	5.64185e-08
Cox10	1.06939	5.73029e-08
Acot13	1.00834	6.78121e-08
Uqcr10	1.25641	7.45278e-08
2310039H08Rik	1.42099	8.4012e-08
Ndufv1	0.972935	8.59076e-08
Pyurf	1.1259	8.69268e-08
Ndufb8	1.14474	9.13019e-08
Chchd10	1.96904	9.41755e-08
Mrps33	0.865922	1.03412e-07
Higd1a	0.972152	1.03843e-07
Ndufab1	1.30703	1.13913e-07
Aldh5a1	1.05181	1.19958e-07
Iars2	0.951172	1.21778e-07
Fam195a	1.52475	1.31379e-07
S100b	1.72318	1.33328e-07
Atp5c1	0.983931	1.34458e-07
Cpt1b	1.2733	1.36838e-07
Cisd3	1.26374	1.41824e-07
Pomt1	1.03824	1.4523e-07
Ndufaf6	1.16108	1.46466e-07
Mtif2	0.849138	1.47814e-07
Atp5k	1.43949	1.65361e-07
Urod	0.808014	1.81361e-07
4931406C07Rik	1.19768	1.95666e-07
Tufm	0.870656	1.9841e-07
Timm8a1	1.11447	2.06845e-07
Cpt2	1.26914	2.09721e-07
Mrpl50	0.920618	2.11048e-07
Taco1	1.05841	2.2691e-07
Mrpl37	0.86621	2.36256e-07
Itpk1	1.31931	2.45617e-07
Cox7c	1.56814	2.51673e-07
1110008P14Rik	1.12017	2.59542e-07
Slc25a5	0.906407	2.73624e-07
Hibadh	0.883349	2.95958e-07
Lrpprc	0.931157	2.99762e-07
2210016F16Rik	0.89195	3.20546e-07
Pcca	1.14266	3.20619e-07
Atp5e	1.01245	3.23291e-07
Fabp3	2.25952	3.48801e-07
Acyp2	0.971841	3.51296e-07
Oxnad1	0.897053	3.7301e-07
Abcd3	1.12162	3.94455e-07
Lbp	-1.87019	4.1327e-07
Timm10	1.11894	4.15049e-07
Cox8b	2.12754	4.38037e-07
Naa38	1.02919	4.3931e-07
Psmb5	0.89773	4.9184e-07
Higd2a	0.753795	4.96982e-07
Ndrg2	1.16334	5.1991e-07
0610012G03Rik	1.01552	5.29718e-07
Atad3a	0.925126	5.29718e-07
Cd1d1	1.18686	5.31734e-07
2410015M20Rik	0.920994	5.5015e-07
Pecr	1.1162	5.50514e-07
Ndufs6	1.06999	5.88233e-07
Inhbb	-1.46552	5.97456e-07
Fam110c	2.46945	6.74569e-07
Rars2	0.750369	6.8729e-07
Pnpla8	1.02687	7.25218e-07
Acads	0.953307	7.41363e-07
Bckdhb	0.880052	7.64995e-07
Myl6b	1.27448	7.74467e-07
L3hypdh	0.936369	7.80546e-07
Phb2	0.91165	8.27491e-07
Mecr	0.927549	8.27491e-07
Rtn4	0.991858	8.27491e-07
Srl	1.41102	8.28378e-07
C030006K11Rik	0.894694	8.29564e-07
Ndufaf1	0.902769	8.3955e-07
Gm14057	2.19404	9.24684e-07
Tuba8	2.42295	9.44798e-07
Pde4d	1.43617	9.69933e-07
Ptpmt1	0.962765	9.99561e-07
Tomm40	1.02244	1.13884e-06
Lamtor1	0.833361	1.20368e-06
Eci2	0.879955	1.20912e-06
Cisd1	0.941237	1.21588e-06
Fam132a	1.10184	1.36708e-06
Gstt1	-1.13728	1.38512e-06
Hccs	0.886442	1.38512e-06
ChkbCpt1b	0.990571	1.39329e-06
Cspg5	2.07694	1.4252e-06
Slmo2	0.954461	1.43799e-06
Mmaa	0.871163	1.5156e-06
Dhrs11	1.01192	1.56875e-06
Prtn3	-2.83073	1.82282e-06
Mrps30	0.843243	1.89786e-06
Vac14	0.900302	1.95499e-06
1110008F13Rik	0.843732	2.01513e-06
Acat2	0.903911	2.1088e-06
Mycbp	0.909972	2.25914e-06
Ndufa13	0.964232	2.30483e-06
Sdr39u1	0.870558	2.30483e-06
Ephx2	1.46096	2.33827e-06
Acad9	0.777398	2.39197e-06
Tomm6	0.826646	2.45636e-06
Dnajc19	0.867866	2.4589e-06
Mrpl34	1.30645	2.55375e-06
Ndufa10	0.949757	2.66169e-06
Slc25a17	0.958352	2.66954e-06
Slc36a2	0.941109	2.99597e-06
Sfxn1	0.887542	2.99597e-06
Cox17	1.18926	3.01428e-06
Bcap31	0.847299	3.1517e-06
Opa1	0.899103	3.15984e-06
Msra	0.838209	3.25793e-06
Pmpcb	0.905348	3.26141e-06
Ndufaf4	0.946192	3.46378e-06
Gm9696	3.17408	3.61443e-06
Fxyd1	0.822235	3.65292e-06
Adssl1	1.15664	3.68169e-06
Tmem97	1.09295	3.73824e-06
Ptplb	1.06327	3.73826e-06
Vdac1	0.886336	3.89274e-06
Tnxb	-1.22834	4.11114e-06
Ak3	0.947191	4.22279e-06
Psph	0.977458	4.25415e-06
Slc25a19	0.952143	4.28434e-06
Dhrs4	0.961497	4.32419e-06
Lonp1	0.793751	4.42852e-06
Mcts1	0.795369	4.47249e-06
Ech1	0.902407	4.60979e-06
Xrcc3	1.48648	4.95507e-06
Vat1l	-2.38506	4.96526e-06
Ace	-1.59233	5.00703e-06
Asna1	0.728099	5.16303e-06
Mpdu1	0.957355	5.36707e-06
Npr3	-2.13973	5.91029e-06
Acat1	0.915735	6.1723e-06
Timm9	0.913714	6.53792e-06
Timm17a	0.881197	6.53792e-06
Gpi1	1.15039	6.60744e-06
Idh3g	0.900919	6.89985e-06
Polr1d	0.786847	7.17296e-06
Pcyt2	0.932487	7.17296e-06
Mmadhc	0.736599	8.0699e-06
Mrpl15	0.803823	8.24594e-06
Ufsp2	0.723903	8.38799e-06
Tmem135	0.945348	8.44365e-06
Pop5	0.998195	8.46468e-06
Fam131c	7.19098	8.57278e-06
Smim20	0.836926	8.57278e-06
Zfyve21	1.02649	8.57278e-06
Impa2	1.49596	8.91258e-06
Ptprd	1.0141	9.19205e-06
Isca1	0.801475	9.2862e-06
Gsn	-1.09118	9.28944e-06
Pfkm	0.843134	9.56742e-06
Elovl4	3.45784	9.97937e-06
Mpv17l2	0.881545	1.03778e-05
Ppp1r3c	1.41221	1.04903e-05
Cox5a	1.53284	1.11525e-05
Agpat2	1.22873	1.12916e-05
Acsl5	1.20398	1.13118e-05
Hist1h1d	2.79267	1.13118e-05
Fam213b	1.04309	1.13118e-05
Mrps10	0.864726	1.17861e-05
Pfkl	1.15015	1.17895e-05
Ahcyl1	0.91042	1.22147e-05
Pdhb	1.33424	1.23437e-05
Cox16	0.882578	1.25213e-05
Acad8	0.747143	1.28856e-05
Bckdk	0.700762	1.31266e-05
Hdhd3	1.52415	1.33102e-05
Slirp	0.901545	1.34775e-05
Perm1	2.06052	1.37099e-05
Thrsp	1.47476	1.38583e-05
Slit3	-1.41338	1.39395e-05
Mrps18a	0.907469	1.41483e-05
Txn2	0.771594	1.42415e-05
Coa3	0.749899	1.43753e-05
Tmem43	-1.27312	1.46843e-05
Tmem242	0.886747	1.46843e-05
Emp1	-1.90904	1.48912e-05
Cox6c	1.0513	1.51775e-05
Tmem79	1.29436	1.525e-05
Hist1h1c	1.42041	1.53136e-05
Ankrd9	1.91122	1.54166e-05
Sar1b	0.708139	1.59297e-05
Stradb	0.896442	1.6074e-05
Mrps23	0.733251	1.64018e-05
Mcat	0.849978	1.64018e-05
Gcsh	0.822331	1.67057e-05
Bscl2	0.879857	1.69335e-05
Top1mt	0.893654	1.69902e-05
Pak1ip1	0.691937	1.71354e-05
Mrpl22	0.760656	1.82452e-05
Mtfp1	1.22692	2.02656e-05
Rnf217	1.29985	2.11686e-05
Nmnat1	1.2755	2.13319e-05
Idh2	0.809006	2.2394e-05
Slc2a4	1.10721	2.28025e-05
Pigr	2.06867	2.28252e-05
Cbr1	0.750899	2.30806e-05
Tlcd1	1.14572	2.31341e-05
Mpc1	1.29868	2.32739e-05
Nadk2	0.761697	2.57059e-05
Mrps21	0.786872	2.58978e-05
Crls1	0.889777	2.60949e-05
Pde4a	1.01438	2.64188e-05
Nit2	0.794253	2.64188e-05
Mmab	0.96201	2.65448e-05
Pank1	1.12037	2.72721e-05
Sdha	0.879741	2.8289e-05
Cdc42ep1	-1.10796	2.97807e-05
Cyp51	1.39729	3.12239e-05
Mrpl44	0.767154	3.4101e-05
C4b	-1.71084	3.41752e-05
Vdac2	0.710072	3.49196e-05
Oxa1l	0.690556	3.49196e-05
Pex11g	0.816813	3.51463e-05
Ndufa2	1.01454	3.63673e-05
Pex16	0.834706	3.63673e-05
Fastkd1	0.788718	3.66344e-05
Tmem69	0.8224	3.67892e-05
Mrps16	0.836343	3.68349e-05
Mrps31	0.78311	3.6989e-05
Psma1	0.731721	3.79375e-05
Ccdc80	-1.44804	3.79508e-05
Amacr	0.916912	3.81794e-05
Hsdl2	1.12312	3.86984e-05
Pim1	1.06283	3.90432e-05
Cyp2f2	-2.08309	3.90788e-05
Pdss1	1.31964	3.97404e-05
Fdps	1.48317	3.98379e-05
Sult1e1	-1.97973	3.98379e-05
Adamts5	-1.47518	3.99195e-05
Uba3	0.713816	3.99195e-05
Mocs2	0.741409	4.03026e-05
Prdx5	0.75831	4.10026e-05
Slc25a51	1.02584	4.15255e-05
Guf1	0.682802	4.17833e-05
Psma6	0.711574	4.21326e-05
Mrps5	0.763016	4.22247e-05
Cd320	0.98847	4.22247e-05
Ccbl2	0.837802	4.22572e-05
Tfb2m	0.749622	4.23198e-05
Dpt	-1.19027	4.33261e-05
Pgm2	0.742144	4.37077e-05
Rnf11	0.893657	4.39539e-05
Pex19	0.750999	4.42258e-05
Svep1	-1.39312	4.53902e-05
Mrap	0.880816	4.55697e-05
Echdc1	1.1301	4.59677e-05
Crtac1	-3.22111	4.84396e-05
Serhl	0.784468	4.84396e-05
Mtch1	0.705002	4.93314e-05
BC003965	0.771629	4.95759e-05
Ppdpf	0.859604	5.19225e-05
Cbx6	-0.8758	5.30236e-05
Tefm	1.00283	5.53231e-05
Hsd17b4	0.932521	5.5763e-05
Aspa	0.979848	5.5927e-05
Mmachc	0.809512	5.64277e-05
Rbm47	1.12284	6.10504e-05
Prkaca	0.819658	6.28594e-05
Taldo1	0.849329	6.29414e-05
Ndufaf2	0.804674	6.47529e-05
Pitx3	5.90723	6.47529e-05
Timm13	0.977355	6.63548e-05
Mrps28	0.965729	6.72007e-05
D430019H16Rik	-1.71542	6.74974e-05
Stx18	0.659241	6.86123e-05
Abhd11	0.755739	7.0702e-05
Mlf2	0.72783	7.22792e-05
Fam120aos	1.01156	7.22792e-05
Slc25a16	0.748326	7.22792e-05
2700089E24Rik	0.796812	7.22792e-05
Timm50	0.876803	7.25124e-05
Mrpl9	0.691528	7.35844e-05
Ptgr2	0.711327	7.38602e-05
P2rx5	1.08494	7.50605e-05
Hmgcs1	1.23758	7.54006e-05
Mrpl45	0.726963	7.56151e-05
Grsf1	0.723243	7.60241e-05
Apip	0.771642	7.74887e-05
Prkaa2	1.11088	8.05662e-05
2310061I04Rik	0.933341	8.17232e-05
C1qbp	0.672461	8.26412e-05
Tsfm	0.887547	8.39835e-05
Tfr2	1.84869	8.40592e-05
Aldoa	1.19262	8.4218e-05
Poldip2	0.804947	8.56115e-05
Fhl3	0.923832	8.58155e-05
Ucp1	1.88433	8.59585e-05
Maoa	0.752784	8.84758e-05
Mrpl17	0.752473	8.9764e-05
Bag1	0.828645	9.04368e-05
Mrpl2	0.834216	9.22841e-05
Cops3	0.660176	9.75662e-05
Ralgapa2	0.982618	0.000102455
Chpt1	0.98188	0.000102638
Dbt	0.871093	0.000105329
Foxred1	0.658067	0.000106864
Adam12	1.22612	0.000106879
Upk3b	5.15153	0.00010852
Crat	1.1294	0.000111566
Fam162a	0.823311	0.000112907
Gnas	0.992844	0.000114976
Cmc2	0.975228	0.000116552
Plin2	0.96666	0.000116552
Mapk6	0.74421	0.000118199
Rarres2	-1.04856	0.000118574
Msrb2	0.823712	0.000118574
Mtm1	0.81543	0.000121737
Cdo1	0.968848	0.000122047
Dnajb9	0.753295	0.000125288
Mab21l2	2.09509	0.000125786
Mrpl47	0.843931	0.000129079
Hmbs	0.710044	0.000129541
Nol3	1.01088	0.000132763
Aldh1l1	0.855168	0.000135881
Tmem126a	0.699778	0.000135881
Phgdh	-0.9292	0.000137006
Pebp1	0.740637	0.000137092
C2	-1.51368	0.00013806
Tmem147	0.832445	0.000140963
Sfxn5	0.883404	0.00014581
Cntnap1	0.966715	0.000145847
Pmpca	0.636435	0.000153474
Mrpl38	0.728848	0.000156711
Pgd	1.46636	0.000161988
Mtpap	0.694868	0.000162285
Gale	1.06948	0.000162333
Mup3	1.9708	0.000164207
Lgr6	3.73819	0.000165127
Vwa8	1.09068	0.000166154
Commd3	0.609903	0.000179857
Gypc	0.988257	0.000180267
Gpd2	1.40529	0.00018076
Prps1	-0.79233	0.000186676
Trmt2b	0.617466	0.000188612
Slc25a1	1.27249	0.000188625
Tysnd1	1.11444	0.000190956
Pdha1	1.16974	0.000191888
Pcsk6	-0.99176	0.000192361
Lgi2	-2.04209	0.000201685
Tmem223	0.743994	0.000201685
Podn	-1.12883	0.000201685
Arl2	0.724962	0.000207835
Adamtsl4	-1.14017	0.000207881
Suclg2	0.716861	0.000210139
Ubac1	0.661618	0.000213971
Abcb6	0.654058	0.000221976
Samm50	0.729156	0.000229886
Prdx2	0.739986	0.000231571
Atp6v0e	0.623668	0.00023301
Mtg1	0.68324	0.00023388
Uqcr11	0.920233	0.000234877
Gsta4	0.772881	0.00024059
C130074G19Rik	1.061	0.000241358
Rsad1	0.830366	0.000244328
Car13	0.763363	0.000245879
Rpl39l	1.97384	0.000246014
Stoml2	0.588107	0.000269758
Plin5	1.2043	0.000270647
Psmb7	0.618358	0.000287397
Sod3	0.9461	0.00028789
Esyt1	-0.701976	0.000295829
Emc9	0.699403	0.000296518
Mrps15	0.72826	0.00030148
Hagh	0.664686	0.000305784
Msrb1	0.940519	0.000309316
Axl	-1.16845	0.00031032
Vps25	0.636549	0.000313221
Hdhd2	0.630308	0.000314465
Adig	0.762456	0.000319411
2017-03-05	0.695259	0.000325434
Tmem41a	0.98264	0.000328212
Igsf21	1.53359	0.000348935
Cox6a1	0.995485	0.00034946
Carkd	0.620426	0.00034946
Mrps14	0.726307	0.000353304
Eif4e3	0.831917	0.000357317
A830018L16Rik	0.943055	0.000365838
Rpp40	0.925901	0.000368442
Gys1	0.74898	0.000374226
Rab3a	1.01806	0.000375839
Gbas	0.697041	0.000380766
Btf3l4	0.561366	0.00038167
Pam16	0.861384	0.000390135
Mapre3	0.718184	0.000390135
Mkks	0.721793	0.000396553
Nfu1	0.660008	0.000396553
Cpn2	1.03142	0.000401796
Stom	0.791366	0.000405309
Glul	1.119	0.00040806
Clpp	0.691349	0.00041632
Hist1h4h	2.18959	0.000429153
BC031181	0.602647	0.000429226
Acot11	1.73438	0.000430351
Cox8a	0.833845	0.00043411
Lyplal1	0.857566	0.000442151
Prr32	-3.07742	0.000443873
Uqcrq	1.19709	0.000464893
Ppapdc2	0.704898	0.000466477
Itpka	1.30594	0.000479521
Ict1	0.734204	0.000488682
Atp5g3	0.97357	0.000488682
6430573F11Rik	1.29934	0.000490758
Mfn2	0.761712	0.000490758
Nudt19	0.824646	0.000492694
Vipr2	1.98845	0.000500275
Cpped1	0.670688	0.000507244
Dnajc11	0.629834	0.000508918
Ndufa7	0.717642	0.00052511
Itgbl1	-1.60852	0.000528244
Mrpl53	0.919379	0.000531863
Mcur1	0.686317	0.000544339
Gfm2	0.692442	0.000544339
Nme1	0.715124	0.000561963
Sncg	-1.50626	0.000563365
Esrrg	1.40664	0.00056875
Fbxw5	0.594081	0.000571829
B330016D10Rik	1.26436	0.000577842
Cript	0.635911	0.000594177
Ntrk2	-1.34781	0.000594663
Fibin	1.15571	0.000598497
Esrra	0.899631	0.000615991
Yif1b	0.643968	0.000620082
Hfe	0.699879	0.000620082
Pmvk	1.38306	0.000630482
Lmf1	0.668266	0.000630766
Cox20	0.886137	0.000634356
Akap7	0.791588	0.00064382
C1s1	-0.893061	0.000650865
Wt1	5.03027	0.000659955
Ndufb11	0.794897	0.00066081
4631405J19Rik	2.79617	0.000670865
Tbrg4	0.685	0.000691839
Ttc25	2.45096	0.000698214
Tst	1.3427	0.000702834
Gpx3	-1.04407	0.000708062
Mrpl18	0.622449	0.000710035
Deb1	0.868455	0.000710249
Hemk1	0.84276	0.000721797
Ndufb3	0.69983	0.000722601
Dysf	0.746328	0.000723834
Fbxl4	0.709845	0.000744464
Slc25a34	3.15992	0.000744793
Fastk	0.630194	0.000744793
Snx10	0.706185	0.000744793
Kcmf1	0.683901	0.0007464
Ndufa3	0.764034	0.00075129
Arhgef19	3.15197	0.000753405
Pla2g2e	1.66436	0.000761852
Cmpk1	0.699987	0.000769892
Rgs2	1.48493	0.000814853
G6pdx	0.999143	0.000816995
Cd34	-1.04495	0.000816995
Eno1	1.23201	0.000827103
Sec14l4	1.77203	0.000847937
Tecr	0.855451	0.000849605
Npcd	-1.11402	0.000874548
Mtrf1	0.858554	0.000885624
Mogat2	1.83378	0.000886416
Oxsm	0.647707	0.000890044
Cxadr	1.01205	0.000893569
Sephs2	0.723683	0.000893569
Mrps34	0.736741	0.000893569
Mccc1	0.762764	0.000899188
Slc25a11	0.602027	0.000900699
Dip2a	0.670707	0.000901402
Eno1b	1.24233	0.000908592
Mvk	0.743775	0.000914949
Mrpl54	0.770349	0.000917384
Eif4e	0.567674	0.000923436
Spata22	1.18657	0.000923436
Ndufaf7	0.652441	0.000923761
Tubg1	0.668819	0.000935561
Itfg3	0.677314	0.000935719
1700047M11Rik	3.27083	0.000935719
Pkm	1.06542	0.000944113
Cox5b	1.30104	0.000995542
Mrpl28	0.711619	0.00101642
Ddt	0.805578	0.00102206
B230119M05Rik	2.40464	0.00103583
Fn1	-2.05938	0.00105307
Gipc1	0.602951	0.00105307
Rpp14	0.64294	0.00107106
Rcbtb2	0.695306	0.0010779
Lactb2	1.01107	0.00107864
Thrb	0.81032	0.00109622
Thbs3	-1.28591	0.00111492
Slc25a42	1.0147	0.00112179
Mtx1	0.609567	0.00112228
Galm	0.63993	0.00113092
Tkt	1.37673	0.00114268
Lctl	-1.53723	0.00114601
Ptdss2	0.754115	0.00117917
Kcnk4	3.9575	0.00119189
Plin3	0.633132	0.00122638
Desi1	-0.630751	0.00123246
Lipf	2.49597	0.00124184
Atg9b	1.54831	0.00124507
Sirt3	0.784417	0.00124586
Aldh4a1	0.730466	0.00125231
Commd1	0.608767	0.00126426
Prkd1	0.766651	0.0012832
Mrpl13	0.59595	0.0012875
1110001J03Rik	1.3095	0.00129418
Mrps18c	0.672783	0.00130891
Kcnb1	1.45448	0.00133003
Slc25a35	0.945688	0.00133003
Ociad2	2.13691	0.00133281
Btbd1	0.617666	0.00133817
Tmx2	0.51778	0.00136953
Lpin1	1.08324	0.00137407
9430016H08Rik	0.733213	0.00137565
Setd8	0.898128	0.00137565
Cyp2b10	3.2922	0.00137565
Thbd	-1.44701	0.00138914
Pi16	-1.66925	0.00139615
Nuggc	-2.96428	0.00139877
Lama2	-1.19133	0.00140921
Pcolce2	-1.65037	0.00140921
Ptcd2	0.636646	0.00141448
Mrpl4	0.651124	0.00143835
Afg3l1	0.581537	0.00145069
Hp	-1.17201	0.00145412
Aifm3	2.17345	0.00145412
Slc31a1	0.594641	0.00145412
Cp	-0.907449	0.00147739
Fech	0.622734	0.00149825
Abhd5	0.842224	0.00152307
Cebpb	1.68864	0.00154082
Pth1r	1.36742	0.0015546
Cluh	0.826394	0.00155654
Endog	1.35181	0.00155822
Anapc13	0.603283	0.00157536
Ids	-0.616082	0.00159547
Nlrx1	0.855013	0.00159574
Ctcflos	0.969492	0.00159574
Pigq	0.669352	0.0016194
Adamts2	-1.09436	0.00163103
Mrpl41	0.547352	0.00163103
Aurkaip1	0.606024	0.00163183
Mterfd2	0.639699	0.00163422
Eral1	0.569772	0.00165818
Plat	-1.52878	0.00169054
Fam57b	1.49911	0.00171755
Echdc2	0.820698	0.00173879
Uqcc2	0.73195	0.00175078
Cat	0.925986	0.00175078
Omd	-1.74145	0.00175335
Prlr	1.03932	0.0017849
P2ry2	1.23417	0.00179256
Cgrrf1	0.665768	0.00181158
Abcb10	0.685795	0.00184394
Wdr93	0.993883	0.00186023
Ufc1	0.575593	0.00186023
Gsta3	0.967327	0.00186023
Acp1	0.530185	0.00186267
G630090E17Rik	1.46844	0.00187901
Stau2	0.705123	0.00189805
Otop1	1.16768	0.00191223
C1rl	0.838672	0.00191223
Phldb1	-0.903852	0.0019165
Lamb2	-0.767395	0.00192862
Mb	2.95588	0.00194604
Gm20594	1.73923	0.00195451
Trappc4	0.624159	0.00195451
Mmgt1	0.628543	0.00196605
Swi5	0.554523	0.00196605
Prg4	2.00676	0.00197342
Dnajc4	0.605483	0.00197551
Kcnk3	1.00989	0.00198502
1700037H04Rik	0.660202	0.00198727
Gpam	1.06917	0.00198727
Amotl2	-0.901727	0.00200414
Mrpl32	0.575339	0.00205755
Mlycd	0.746088	0.00205755
Klf4	-0.942187	0.00207237
L2hgdh	0.682778	0.00209103
Larp1b	0.669257	0.0021032
Aspg	1.31866	0.00217669
Bsg	0.713159	0.00218468
Adra1a	1.13517	0.00218468
Fam89b	0.717421	0.00218468
Lypla1	0.573583	0.00220655
Coa5	0.640431	0.00221878
Mrpl55	0.693595	0.00222447
Sbsn	-1.32073	0.00223275
Tmem177	0.711263	0.00224078
Mrpl48	0.553072	0.00226134
Gpc3	-1.12079	0.00228124
Gtf2h5	0.609273	0.00231382
0610009O20Rik	0.538655	0.00232776
Mrps11	0.745853	0.00233896
Gmps	0.574855	0.00236202
Cfh	-1.17575	0.00236351
Rps27l	0.745158	0.0023849
Cyp2d22	0.884072	0.00240286
Endod1	-0.850915	0.00243387
D10Jhu81e	0.572775	0.00243387
Ndufa1	0.744511	0.00248261
Slc12a4	-0.749312	0.00251409
Tom1l1	0.864957	0.00252992
Eef1a2	6.52934	0.0025481
Rilp	0.870768	0.00255509
Grb14	-0.92524	0.00258077
Coq10a	0.650897	0.00258463
Anxa3	-0.991915	0.00258463
Qdpr	0.518035	0.00259994
Nampt	0.863587	0.00259994
Acot5	3.30861	0.00259994
Fbxo8	0.66835	0.00269477
Rtn3	0.587415	0.00270677
Dhcr24	0.879262	0.00271171
Pex3	0.675198	0.00273669
Tiparp	0.69834	0.00276563
Ppcs	0.755046	0.00276948
Nsdhl	1.12135	0.00279501
Slc25a46	0.636704	0.00279953
Serpina3n	-1.29909	0.00280065
Plin4	-0.902046	0.00280407
Gbe1	1.11992	0.00280407
Mrpl19	0.593596	0.00282373
Apobec3	-0.791124	0.00284085
Immp2l	0.91658	0.00290636
Rnpep	0.532688	0.00291177
Mrrf	0.61864	0.00291472
Tmem53	0.816589	0.0029238
Endou	-1.37534	0.00302552
Hint2	0.647918	0.00303542
Mto1	0.602978	0.00304903
Arhgap35	0.691729	0.00307306
Glt8d2	-1.65955	0.00307306
Cd109	-1.85628	0.00307584
Slc25a33	1.04906	0.00309824
Pald1	0.677738	0.00318809
Dnpep	0.524048	0.00320448
Timm22	0.690838	0.00320448
Jup	-0.838356	0.00321425
Cnst	0.949626	0.00324569
BC005764	-1.34961	0.00324569
Emc4	0.579121	0.00324569
Lurap1	1.0886	0.00329261
Mterfd3	0.739625	0.00333442
C330007P06Rik	0.636306	0.0033418
Phpt1	0.600997	0.00340155
Cadm3	-1.27065	0.00342659
Naprt1	0.819472	0.00350947
Adck4	0.659052	0.00352334
Ltbp1	-0.950093	0.00354763
Tomm20	0.517138	0.00355916
Pla2g6	0.728495	0.00357533
Stk16	0.592908	0.00364111
Flcn	0.785235	0.00366054
Pdss2	0.800634	0.00368896
Dis3l	0.563543	0.00370089
Osgepl1	0.622492	0.00370135
Dock9	-0.790195	0.00372084
Rnf7	0.525822	0.00373806
Peg13	-0.620528	0.00373806
Hist1h4d	2.98773	0.003753
Loxl4	-1.55876	0.00375586
Gyg	0.556175	0.00378298
Atp1a2	0.791621	0.00380271
Clpb	0.552686	0.00381466
Gng13	5.85141	0.00388705
Fcrls	-1.24674	0.00388705
Pef1	0.529278	0.00388705
Mgmt	0.926118	0.00391684
Mcam	-0.757285	0.00393506
Tmem11	0.598684	0.00393506
Haus3	0.783845	0.00393506
Cdkn1c	-1.00607	0.00393506
Pex6	0.744682	0.00394096
Xpnpep1	0.499095	0.00396122
Nudt2	0.744026	0.00396823
Txndc16	-0.63221	0.00400229
Klhdc10	0.600791	0.00400229
Tarsl2	0.773177	0.00401834
Upk1b	3.74401	0.00402618
Acsl3	1.05555	0.00402618
Glb1l2	-0.8075	0.00402944
Emc10	0.51405	0.00402944
Oxld1	0.894129	0.00405152
1700086O06Rik	1.15852	0.00406096
Ddhd2	0.667917	0.00410023
Ginm1	0.658837	0.00410155
Gstt3	-1.08123	0.0041253
Dagla	0.768247	0.004134
Krt79	1.02461	0.00413466
Denr	0.553641	0.00414711
Mlxipl	0.949833	0.0041698
Hint1	0.649349	0.00417852
Mocs1	0.650619	0.00420123
Grhpr	0.617773	0.00425067
Actn3	4.39864	0.00426091
Pmm2	0.51548	0.00443288
Aifm2	0.676285	0.00446547
Plet1os	1.50063	0.00459967
Aacs	1.07154	0.00459967
Clstn3	1.20069	0.00459967
Nr1h3	0.592336	0.00459967
Mrps12	0.639795	0.00460383
Ces1d	0.695849	0.00460383
Rnf24	0.886118	0.00462673
Mipep	0.588382	0.00465478
Scp2	0.773438	0.00467322
Cbx7	-0.758875	0.00469994
Osmr	-0.698691	0.00470899
Pwwp2b	0.979735	0.0047284
Apoa1bp	0.516202	0.0047376
Lgr4	0.676342	0.00479211
Ugcg	-0.628608	0.00480781
Mgl2	-0.855894	0.00484452
Mrpl3	0.507383	0.00484452
Pla1a	-1.14664	0.00484452
2017-03-02	0.559163	0.00484452
Psat1	0.70217	0.00485169
Gm5523	1.89852	0.00486833
Hras	0.526503	0.00490463
Mfsd3	1.02335	0.00490463
Uck1	0.593577	0.005021
4930546K05Rik	3.59399	0.00506184
Lyve1	-1.0902	0.00506184
1700055N04Rik	1.98624	0.00507274
Ebf3	0.809086	0.00507274
Acacb	0.836184	0.00509902
Emc2	0.539307	0.00511272
Tomm40l	0.615941	0.00519241
Ube2m	0.550947	0.00524384
Romo1	1.3468	0.00524384
Stk38l	0.785004	0.00530164
Myeov2	0.680231	0.00531986
Oxct1	0.829252	0.00534028
Stc2	-1.04812	0.00537304
Eepd1	-1.10647	0.00537889
Bckdha	0.573415	0.00537889
Fn3k	1.09061	0.00555849
Mfsd8	0.607225	0.00559646
Lamtor4	0.548544	0.00559646
Ghdc	0.629987	0.00561263
Naa20	0.59094	0.00562691
Edf1	0.65223	0.00563547
Rexo2	0.63118	0.00573456
Mrpl10	0.498715	0.0057433
Tomm7	0.617249	0.00575221
Mrpl43	0.554944	0.0057795
Mrpl14	0.637925	0.00581035
Mettl22	0.673094	0.00583972
Scarb2	0.641256	0.00589014
Mir6367	-0.926191	0.00589047
Mrps9	0.50062	0.00589833
Gng5	0.528512	0.0059519
Fabp12	2.55756	0.00596357
Lgals6	0.762458	0.00596969
Serping1	-0.961849	0.00601713
Adtrp	1.47381	0.00603579
Fstl1	-1.21384	0.00603579
Mrps17	0.548798	0.00604803
Prss27	1.36066	0.00604803
Gas6	-0.919858	0.00607982
Opn3	-1.10525	0.0061391
Mir7653	1.20664	0.00617973
Bet1	0.609149	0.00617973
Hdac7	-0.656452	0.00617973
Spire1	0.845616	0.00619834
Adcy5	-1.04935	0.00622943
Mcts2	0.76698	0.00627283
Sycp3	1.51134	0.00628794
Trak1	0.669039	0.00628794
Mir3076	1.22578	0.00628794
Fam213a	0.624585	0.00647229
Rfk	0.450452	0.00647496
Wdr92	0.990374	0.00652147
Micu3	0.60155	0.00657074
Acy3	0.622592	0.00658092
Rhob	0.97022	0.00658092
Tbkbp1	0.654998	0.00664203
Rfxank	0.822498	0.00667933
Hpdl	1.51814	0.00668439
Ckm	5.72151	0.00668439
Slc30a1	-0.52894	0.00668754
2300009A05Rik	0.915722	0.00691337
Slc25a44	0.63347	0.00691337
Gde1	0.542682	0.00692989
Tor3a	-0.683169	0.00700061
Aadac	4.68131	0.00704947
Adap1	1.00808	0.00704947
Ccdc144b	1.60483	0.00716493
Acaa1a	0.564268	0.00717347
1700047G03Rik	-1.97442	0.00724304
Jazf1	0.753996	0.00733094
Klf14	-2.56431	0.00744472
Trmt10c	0.588883	0.00745646
Cldn12	0.604138	0.00749814
Tmem123	-0.606991	0.00751506
Lrrc59	0.582489	0.00755653
Pgls	0.818145	0.00756295
Pik3cb	0.833011	0.00757922
Fam136a	0.551858	0.00762212
Blmh	0.520105	0.00769292
Synpo	-0.87996	0.00770703
Lap3	0.544926	0.00772095
Aasdhppt	0.557861	0.00772095
Chrdl1	-1.11428	0.00772095
Inppl1	0.49556	0.00772095
Mgst3	-0.58736	0.00774557
Tpd52l1	2.02234	0.00774557
Ptpla	0.773897	0.00774557
Ftsj2	0.796444	0.00774635
Dnmt1	-0.656363	0.00774635
Igj	-1.90546	0.00774649
Dcaf4	0.590167	0.00775637
Pet100	0.587687	0.00779708
Dera	0.716185	0.00780133
Nptxr	-1.24946	0.00792285
Pcnt	-0.585076	0.00792581
C1ra	-0.937567	0.00793084
Pea15a	-0.595966	0.00795783
Megf9	1.08703	0.00801465
Map7d2	2.04832	0.00801942
Macrod1	0.661338	0.00805468
Fdx1	0.9446	0.00808141
Tmem52	3.05613	0.00808236
Bcat2	0.69514	0.00817899
1810026J23Rik	0.499327	0.00821042
Cfb	-1.09721	0.00836671
Comtd1	1.12842	0.0083856
Fxn	0.837293	0.00850976
Akr7a5	0.574345	0.00856946
Slc7a10	-1.19466	0.00856946
Pter	0.836119	0.00858896
Qsox1	0.666705	0.00861365
Gm5617	1.1252	0.00866069
Yaf2	0.61857	0.00874826
Hmgcl	0.530917	0.00876496
Sars2	0.650032	0.00881343
Rgsl1	-2.42059	0.00899927
Slc44a3	0.680589	0.00908472
Dfna5	1.32949	0.00910287
Pdia4	-0.635289	0.00910287
Atp6v1a	0.578275	0.00912722
Fkbp2	0.525971	0.00914124
Dusp22	0.544379	0.00914124
Ptges	1.03894	0.00915324
Tceb2	0.555779	0.00918718
Dtna	-1.41631	0.00918718
Atp6v1e1	0.501023	0.00920102
Ppp1r3a	5.41696	0.00926309
Klhl31	6.23851	0.00929811
Dbn1	-1.09671	0.00932622
N6amt2	0.716306	0.00939014
Sema3e	-2.0584	0.009391
Madd	-0.701559	0.00941918
Mut	0.667613	0.00943914
Plscr4	0.663899	0.00946625
Mybl1	-1.60074	0.00948125
Ggta1	-0.614611	0.00950478
Ntn3	1.32839	0.00953515
Snurf	0.626948	0.00955442
Snrpn	0.626948	0.00955442
Hcfc1r1	0.608622	0.00955442
Notch1	-0.669232	0.00955442
Scara5	-1.34519	0.009614
Myo9b	-0.562365	0.00966721
Slc25a22	0.636778	0.00967681
Sccpdh	0.633673	0.00971457
Kdelc2	-0.673879	0.00974902
Lypd8	-7.06012	0.00977047
Esrp2	2.27257	0.00985941
Dpy19l1	0.500542	0.00985941
Spryd7	0.638613	0.00987615
Prrg2	0.557301	0.00991108
C330018D20Rik	0.533495	0.00997909
Fbln1	-1.26224	0.0100827
Ip6k1	-0.506669	0.0100903
Nudt8	0.719005	0.0101078
Zyx	-0.613143	0.0101078
Fnta	0.485118	0.0101078
Pvrl2	0.593659	0.0101128
Ugp2	0.80514	0.0101946
Tln1	-0.61832	0.0102122
Akr1b8	0.769407	0.0102478
Pdk1	0.854249	0.0102688
Lsm4	0.588338	0.0102688
Fam69b	1.13724	0.0102688
Lgals4	0.729254	0.0104039
Galnt16	-1.00598	0.0104981
Srsf7	-0.559998	0.0105225
Impdh2	-0.623991	0.0106182
Apmap	0.850015	0.0106531
Plbd1	0.602593	0.0106595
Mir686	0.753841	0.0107565
Taf13	0.538905	0.010811
Nabp1	1.05472	0.0108668
Dnajc28	0.638467	0.0108992
Iscu	0.502244	0.0109113
Kng2	1.7617	0.0109715
Pdzd11	0.524442	0.0110507
Tomm5	0.621942	0.0110652
Klb	0.859877	0.0111331
Ogn	-1.03612	0.0111331
Emc3	0.459106	0.0111331
Sh2b2	0.829672	0.0111586
Gm12070	1.07471	0.0111861
Fam115c	0.634885	0.0112367
Prrg3	-0.877342	0.0112886
Pcdhgc3	-0.622882	0.011293
Ccng1	0.586465	0.0114917
Tspan15	0.883464	0.0115345
Rell1	-0.717414	0.0115346
Ggnbp1	1.0962	0.0115742
Mgat4b	0.488632	0.0115742
Trappc1	0.510171	0.0115742
Vgll3	-1.67388	0.0115813
Rpe	0.571253	0.0115968
Fbn1	-1.58916	0.0116142
Xirp2	5.10029	0.0116816
Pctp	0.654274	0.0117113
Jkamp	0.538781	0.0117113
Pkd1	-0.508526	0.0119118
Hsd17b10	0.481604	0.0119745
Pfkp	0.651121	0.0119883
Ap3s1	0.650521	0.0121967
Tnrc6c	-0.513387	0.0122054
Polr3g	0.740378	0.0122461
Nmnat3	0.761109	0.0122461
Gtpbp8	0.666538	0.0122461
Ei24	0.538123	0.0122616
Gcdh	0.46036	0.0122802
Lpl	0.862497	0.0122872
Sh3bgrl	0.704892	0.0123355
Ikbkb	-0.533493	0.0123371
Lrpap1	-0.570022	0.0123529
Glrx3	0.583463	0.0124115
Svip	0.598922	0.0125866
Tmem261	0.560159	0.0125919
Sdc4	1.48858	0.0126234
Dnajc25	0.622342	0.0126857
Lyrm7	0.683814	0.012699
Igfbp7	-0.57269	0.0127425
Mdc1	-0.547462	0.0128251
Samd9l	-0.636018	0.0128474
Cntfr	-1.51322	0.0128474
Lonp2	0.544634	0.0128884
Sacm1l	0.556577	0.0129939
Fam83e	2.12618	0.013113
Ahi1	-0.869378	0.013113
Stxbp6	-0.80795	0.0131317
Prr16	-1.04848	0.0132157
Syde1	-0.598996	0.0132609
Sult2b1	1.97769	0.0132996
Emc7	0.46745	0.0133658
Cfl2	0.595284	0.0133936
Arhgap20	-1.17838	0.0135306
Celsr2	-1.25937	0.0135476
Tm7sf2	0.811108	0.0135973
Fndc1	-1.41105	0.0135973
Stmn4	-2.26052	0.0136705
Il17ra	-0.70425	0.0137802
Cmklr1	-0.958456	0.0139218
Lbr	-0.652625	0.0139218
Lima1	-0.692907	0.013951
Fmnl1	-0.637148	0.0139619
Ccdc3	0.662075	0.0139744
Folh1	-1.93998	0.014016
2010012O05Rik	0.548365	0.014016
Dym	0.531568	0.014016
Ces4a	3.11241	0.0140308
Cops7a	0.441401	0.0140369
Grtp1	0.949406	0.0140726
Nfkb1	-0.526685	0.0140963
Fam86	0.582978	0.0141494
Fads3	-0.783646	0.0142106
Csnk2b	0.45555	0.0142243
BC018507	-0.536775	0.0143187
A430105I19Rik	-0.973688	0.0143187
Pex14	0.575622	0.0143913
Arhgdia	-0.520557	0.014522
Tfrc	0.888513	0.014522
Coq10b	0.617491	0.014522
Tmem181b-ps	-0.607587	0.014522
Bcl2l13	0.596865	0.014542
Flad1	0.436428	0.0145475
Aldh9a1	0.542219	0.0145475
Dyrk1b	0.600517	0.0146246
Tspan13	-0.538847	0.0146823
Capns1	0.534215	0.0146845
Clec16a	0.585142	0.0148658
Gmpr	0.946816	0.0149183
Ptger3	1.07189	0.0149183
Arhgef10	-0.608234	0.0149273
Far1	-0.573042	0.0150036
Myot	6.37785	0.015067
Ildr2	-1.23092	0.0150819
Aldh1a3	-1.43065	0.0151021
Mtif3	0.483442	0.0152027
Slc25a4	0.525347	0.0152132
Cdsn	-1.13583	0.0153767
Phc3	-0.572194	0.0153777
Fam208b	-0.623603	0.0154034
Hspb6	0.796468	0.0154112
Dhdh	0.790436	0.0154416
Ctsd	0.641969	0.0154867
Slc25a3	0.549193	0.0157521
Syt12	0.83866	0.0157521
Flna	-0.746584	0.0158957
Gjc1	-0.966115	0.0158957
Gss	0.625393	0.015936
Trdn	4.41669	0.0160108
Txnrd3	0.537999	0.0160921
Mettl9	0.467345	0.0160921
Reck	-0.879733	0.0161315
Stra13	0.519734	0.0161952
Slc47a1	2.18169	0.0162294
Igfbp2	-1.67994	0.0162655
Chl1	-1.22353	0.0162655
Thnsl2	0.798349	0.0162655
Ecm1	-1.13206	0.0162766
Taf10	0.476805	0.0162766
Senp1	-0.483292	0.0163083
Mrpl21	0.519352	0.0163957
Stard7	0.45567	0.0163957
Abcb1b	-0.818282	0.0164121
Cox19	0.655457	0.0164227
Thg1l	0.593989	0.0164324
Mfsd6	-0.763289	0.0164685
Snx7	0.67002	0.0164859
Zfp367	-0.641093	0.0164859
Heph	-0.634611	0.0164973
Mfsd2a	3.73748	0.0164973
Man1b1	-0.47147	0.0164973
Rgma	0.674315	0.016514
Sh2b3	-0.692457	0.0165724
C1qtnf3	-3.2779	0.0166436
Mpp6	0.721462	0.0166438
Pros1	-0.666082	0.016675
Hexb	-0.709346	0.016675
Gpr4	-0.900662	0.0166845
Atp8b2	-0.74728	0.016689
Lmo7	-0.656623	0.0167522
Mturn	-0.903166	0.016768
Mup20	-4.99964	0.0168312
Cox11	0.739036	0.0169095
Commd6	0.526578	0.0169594
Rab34	0.539075	0.0169949
Supt20	-0.507996	0.0169985
Sco1	0.594058	0.0170505
Pias3	-0.521826	0.0170935
Ahnak	-0.779433	0.0171496
Usp46	0.560627	0.0171753
Slc1a3	-0.848548	0.0171753
Kmt2a	-0.651803	0.01725
Smchd1	-0.551477	0.0172911
Gpr3	3.96983	0.0173281
Unc119	0.792771	0.0173724
Mpst	0.789232	0.0173961
Hspb11	0.667751	0.0174154
Cdkn1a	1.37361	0.0174745
Alg9	0.535047	0.0174833
Palm	-0.841777	0.0175227
Islr	-1.03083	0.0175397
Znrd1as	0.643037	0.0177178
Ogfrl1	-0.513498	0.0177589
Lamtor5	0.504418	0.0178358
Mtor	0.580549	0.0178408
As3mt	0.696867	0.0179185
Yars2	0.703633	0.0179565
Serpine2	-0.872829	0.0179852
Kirrel	-0.966288	0.0180827
Psme4	0.504902	0.0181202
Tek	-0.696435	0.0181533
Cyhr1	0.432095	0.0182352
5830444B04Rik	-1.65394	0.0182776
Ciapin1	0.60469	0.0183461
Pvalb	4.92369	0.018473
Tmem38b	0.704695	0.018473
St3gal2	-0.647892	0.0184798
Nin	-0.5294	0.0185887
Itm2c	-0.546796	0.0186064
Tmem41b	0.564418	0.0186067
Mkln1	0.522958	0.0187149
Orm3	0.938891	0.0187448
Rnls	1.29013	0.0189215
Nsun4	0.539869	0.0189741
Ptchd4	-2.29514	0.0189746
Ifi27l2a	-0.68135	0.0190208
Sdsl	1.0833	0.0190208
Nfs1	0.478763	0.0190208
Tcl1	4.25703	0.0191749
Gm12669	0.558278	0.0193731
Gpr133	-1.55134	0.0194722
Mmel1	4.85546	0.0195038
Rhot1	0.469075	0.0195038
Rnf145	-0.485228	0.0196542
Ntan1	0.446648	0.0197311
Adar	-0.670409	0.0197467
Supv3l1	0.49571	0.0197781
Hoga1	1.18806	0.0198278
Akap11	-0.455166	0.019895
Itpripl2	-0.649597	0.0199018
Galnt10	-0.702474	0.0199269
Fryl	-0.469261	0.0200085
Gfpt2	-1.29181	0.0200292
Tpst1	-0.771996	0.0200465
Col14a1	-1.45765	0.0200601
Kpna6	0.540867	0.0200699
Dhrs3	0.483222	0.0201111
Magel2	2.99687	0.0202831
Pex11a	0.637949	0.0205901
Cd248	-1.30505	0.0206369
Pgrmc2	0.559919	0.0207167
Khdrbs1	-0.446357	0.0207167
Msln	2.71401	0.0207364
Trio	-0.488162	0.0207364
Plekhh3	0.815336	0.0207364
Nutf2-ps1	0.445146	0.0207364
Rad50	-0.646852	0.0208926
Gm5643	-0.575031	0.0208926
Cebpe	-4.42414	0.0209366
Slc16a2	0.778203	0.0209366
Rab1b	0.53919	0.0209542
Sardh	0.542633	0.021187
Ssbp1	0.456399	0.021187
Gyk	1.56179	0.0211938
Elf1	-0.53208	0.0211938
Rab43	-0.545795	0.0212247
Pgrmc1	0.477943	0.021233
Gchfr	1.57232	0.0212684
Ccbl1	0.634012	0.0212684
Ntn4	-1.20416	0.021365
Noa1	0.513571	0.021365
Asxl1	-0.464436	0.021451
Gm10052	-0.578408	0.0214578
Pgp	1.01937	0.0214974
Khnyn	-0.603086	0.0216666
Ell2	0.674808	0.0217412
Wdr73	0.688902	0.0218503
Pld6	2.11444	0.0219339
Sdc3	-0.640123	0.0221101
Pcdhga10	-0.543608	0.0221102
Mycbp2	-0.665367	0.0224311
Retn	0.782654	0.0224311
Aida	-0.493843	0.0224311
Scd2	1.5994	0.0225148
Arhgef3	-0.552198	0.0226686
Pcdhgb1	-0.542427	0.0226934
Igfbp6	-1.04486	0.0226934
Mfap5	-1.28252	0.0228371
Arhgap32	0.499206	0.0228534
Isoc2a	0.572755	0.022863
Slfn5	-0.682792	0.022863
Mrps6	0.596375	0.0228878
Mlx	0.646896	0.0228878
Emilin2	-1.50124	0.0229652
Aars2	0.552868	0.0229652
Prpf3	-0.448006	0.0229652
Ctcf	-0.459829	0.0229652
Sema3d	-1.22552	0.0230097
BC017643	-0.746096	0.0231847
Flnb	-0.626644	0.0232409
Zfp646	-0.521685	0.0232643
Pcdha4-g	-0.637737	0.0233263
Pcdhgb4	-0.541695	0.0233263
Pcdhga3	-0.54189	0.0233263
Pcdhga11	-0.543144	0.0233263
Galnt15	-0.892512	0.0233263
Nop56	-0.551781	0.0233762
Atf5	0.888928	0.0234948
Mir5107	-0.715023	0.0236184
Eci3	0.689187	0.0236337
Zfp862-ps	-0.832744	0.0236969
Pcdhga7	-0.54011	0.0237378
1700061I17Rik	3.23856	0.0237378
1190005I06Rik	1.02738	0.0237983
Hist1h2ad	3.46406	0.0238407
Mcm3	-0.813521	0.0238407
Slco2b1	-0.767868	0.023928
Cdc42ep2	-0.71954	0.0239507
3010033K07Rik	1.0693	0.0239668
Zc3hav1	-0.591705	0.024081
Eif2b1	0.479154	0.0241073
Fastkd2	0.487883	0.0241631
Phf1	-0.63252	0.0241631
Cds2	-0.454591	0.0241631
Hnrnpa1	-0.549389	0.0241631
Pcdhgc4	-0.540822	0.024309
Bmp1	-0.704865	0.0243547
Htra1	-0.585248	0.0243802
Pamr1	-1.07321	0.0243802
Ano10	0.524118	0.0246513
Chga	-4.12958	0.0246513
Timp2	-1.0806	0.0246513
Pycrl	0.665821	0.0246513
Tmpo	-0.520333	0.0246513
Slc20a1	-0.726565	0.024756
Mrs2	0.544563	0.0248195
Fgl2	-0.738528	0.0248305
Cd164l2	1.41963	0.0248325
Pdia6	-0.479171	0.0248328
Mmp19	0.590977	0.0248436
Pcdhgb2	-0.540398	0.0248436
Pacs1	-0.467663	0.0248585
Penk	-0.729754	0.0248585
Sp100	-0.636306	0.0248927
Nfya	-0.588312	0.0249668
Pcdhga8	-0.539379	0.0250631
Pbxip1	-0.527549	0.0250631
Bpnt1	0.478013	0.0250631
Nudt12	0.781142	0.0251237
Ap1s1	0.448489	0.0251237
Slx4	-0.566149	0.025184
Copz2	0.558013	0.0252685
S100a11	0.740231	0.0252685
Pcdhgb7	-0.538878	0.0252685
C1qtnf1	-0.858091	0.0252685
Pcdhga6	-0.536273	0.0252763
Elovl1	-0.568417	0.0252914
Pcdhgb5	-0.532433	0.0252914
Atp6v1c1	0.399305	0.0253269
Shfm1	0.514104	0.0253372
Phldb2	-0.524213	0.0253512
Ampd2	0.564892	0.0253907
Pcdhga9	-0.536636	0.0253937
Mir6960	-4.28829	0.0253937
Ubxn2b	-0.646644	0.0255187
Trim35	-0.46761	0.0256677
Slc25a10	0.921646	0.0257396
Pcdhgb8	-0.537146	0.0257396
Pcdhga5	-0.530399	0.0258091
Cfd	-0.888146	0.0258091
Dact1	-0.962306	0.0258626
Rarg	-0.528347	0.0258698
Pcdhga1	-0.53344	0.0258786
Uchl3	0.480164	0.0259667
Fam13b	-0.638436	0.0259667
Prkar2b	0.785508	0.0259667
Lep	-1.52974	0.0260852
Anxa8	-1.21567	0.0263068
Cnn2	-0.746349	0.0263068
AI462493	0.505749	0.0263152
Mrpl33	0.610098	0.0264049
Nutf2	0.431213	0.0264049
Tmem100	-1.13839	0.0264049
Dbi	0.611786	0.0264049
Mid1ip1	1.39994	0.0264287
Dhrs7b	0.527931	0.0264307
Pcdhga2	-0.533952	0.0264307
Gucd1	0.646432	0.0264307
Mir6999	-2.60983	0.0264307
Ppl	-1.05437	0.0264307
Calr4	1.26115	0.0264315
H2-T23	-0.724907	0.0266052
Hist1h2be	0.873396	0.0266676
Plcb3	0.413042	0.0266947
Ubc	0.758033	0.0266947
Pcdhgb6	-0.528535	0.0266947
Adam15	-0.552584	0.0266947
Rnf114	-0.468327	0.0267928
Man1a	-0.587394	0.026816
B3galt1	1.50128	0.0269903
Cops5	0.425592	0.0270139
Cntrl	-0.578484	0.0270615
Pcdhga4	-0.529832	0.0270615
Cpt1a	-0.685169	0.0270615
Pcdhgc5	-0.532356	0.027097
Irf9	-0.595803	0.027097
2017-03-02	0.482405	0.027097
Krtdap	-2.20341	0.027097
Cyp2j6	0.445867	0.027097
Ccdc57	-2.76057	0.027097
Prss23	-1.00138	0.027097
Slc15a4	-0.715045	0.027097
Aes	0.501662	0.027097
Rpusd3	0.747688	0.0272138
Tmem176b	-0.745085	0.027246
Nfil3	1.43444	0.0274832
Pcdhga12	-0.533295	0.0275555
Slc6a13	-1.13746	0.027712
Pih1d1	0.473456	0.0277558
Bhlhb9	-0.72326	0.0278518
Tcof1	-0.545306	0.0280974
Dhrs9	1.70706	0.028166
Tob1	0.703657	0.0281913
Lipt2	0.857125	0.0283514
Parp14	-0.640633	0.0283514
6430531B16Rik	-5.02353	0.0284423
Uba7	-0.598063	0.0285124
Mxra8	-0.711397	0.0285135
Prdx6	0.550677	0.0285381
Ttl	0.554795	0.0285455
Tmem253	1.38626	0.0287924
Btg2	-0.579874	0.0288469
Rims4	1.36174	0.0288768
Nme2	0.511045	0.029028
Eda	0.928428	0.0290689
Mospd3	0.453928	0.0292523
Hsp90b1	-0.539768	0.0294638
Gstz1	0.564892	0.0294638
Ckmt2	5.42572	0.0294638
Gatad1	0.498264	0.0294638
Mir6392	1.27556	0.0295147
Rbpms	0.44392	0.0295147
Kirrel3	-1.45784	0.0295448
Gm12657	2.73357	0.0295851
Acly	1.68783	0.0296017
6430550D23Rik	1.10368	0.0296628
Ppp1cb	0.527064	0.0297038
Mtx3	0.463745	0.0297387
Zfp704	-0.546603	0.0297451
Uxt	0.520105	0.0298671
Parl	0.50323	0.0299763
Rab1	0.431343	0.0300294
Nfatc2	-0.724138	0.0301669
Esd	0.477303	0.0302344
Parp4	-0.486252	0.0302617
Galntl6	-4.28374	0.0302617
Enc1	0.506036	0.0303771
Pccb	0.588021	0.0304285
Gm6793	-0.511493	0.0305164
Tmem165	-0.478303	0.0305762
Cep97	-0.758753	0.0306304
Csf1	-0.863081	0.0307126
Mllt6	-0.559832	0.030896
Nov	-1.95108	0.030896
Bmp3	-1.32275	0.0309862
4930415O20Rik	2.58724	0.0309862
Rnmtl1	0.719372	0.0309862
Fut11	-0.689442	0.0309862
Pstk	0.681699	0.0309862
Dlg4	-0.721018	0.0309862
Ppp1ca	0.456819	0.0310762
Cdc5l	-0.467879	0.0311591
Inpp5d	-0.722029	0.0312565
Ppap2b	-0.620298	0.0312565
Plcb1	0.617146	0.0313885
Kdelr2	-0.421383	0.0313885
Lamp1	0.508134	0.0313903
Trf	-0.878959	0.0314235
Ttc30b	0.683584	0.0314235
A730046J19Rik	4.07079	0.0314922
Psmb11	2.60162	0.0315178
0610040F04Rik	2.86584	0.0316336
Nt5m	0.606023	0.0316634
Ceacam1	-0.868902	0.031704
Ces2e	-1.53364	0.031704
Sirt4	0.612145	0.0317422
Tmem143	0.468262	0.0318731
Smim8	0.497774	0.0319946
Slc23a2	-0.545343	0.032051
Ppp2ca	0.47854	0.0321833
Dock4	-0.619158	0.0323258
Ccl27a	0.905597	0.0324115
Gnal	-1.42955	0.0324115
Pfdn1	0.4391	0.0324115
Atp6v0c-ps2	0.416461	0.032465
Atp6v0c	0.416461	0.032465
Khsrp	-0.540055	0.032465
Polr2i	0.569164	0.0325888
Prodh	-0.73708	0.0325888
Hdac2	0.416532	0.0325888
Dph3	0.513484	0.0326048
Dock10	-0.619398	0.0326085
Gas7	-1.03679	0.0326888
Hbb-b2	1.52643	0.0327104
Hbb-bt	1.52643	0.0327104
Ptbp1	-0.443811	0.0327104
Hmgb2	-0.796263	0.0327104
Kcnj11	2.24418	0.0327667
Neat1	0.677953	0.0328782
Adamts16	-2.08392	0.0328918
1700096K18Rik	0.771138	0.033079
Clca3	-7.28157	0.0332188
Ifit2	-0.691294	0.0332188
Muc13	-3.28798	0.0334232
Gba2	-0.552761	0.0334232
Cd2bp2	-0.425596	0.0334657
8430427H17Rik	0.781046	0.0335099
2017-03-01	1.32847	0.033515
Plcl1	-0.842397	0.0335205
2410089E03Rik	-0.521375	0.0335205
Me2	-0.509595	0.0335798
Apbb2	-0.528597	0.0335798
Fsd1	2.50289	0.0336041
Mbnl2	0.610844	0.0336844
Chchd7	0.647104	0.033716
Arhgdig	2.64527	0.0337215
Angptl2	-0.681841	0.0339162
Nr4a2	0.8861	0.0339162
Lrrcc1	-0.477361	0.0339233
Mxra7	-0.653933	0.0339233
Notch2	-0.469645	0.0340019
Abca6	-1.16391	0.034039
Gphn	0.485524	0.034039
Grap	-0.741902	0.0342042
Slu7	-0.414988	0.0343013
Gpc6	-1.05404	0.0343775
Copz1	0.438379	0.0343775
Pcna	-0.533423	0.0343839
Poglut1	-0.494689	0.0344715
Aebp1	-0.949852	0.0345942
Dhx32	0.799065	0.0346142
Itpkb	-0.575197	0.0346142
2017-09-15	0.502755	0.0349289
Chd8	-0.42257	0.0350025
Tdrp	-0.694258	0.0350404
Ddrgk1	0.452576	0.0350404
Myo5b	1.14709	0.0351502
Lrtm1	1.2464	0.0351592
Scara3	-1.13155	0.0352138
Tmem132b	-3.77569	0.0352828
Mtfr1l	0.40557	0.0353626
Cox18	0.673574	0.0354039
AI317395	1.50912	0.0354478
Ube2z	-0.413456	0.0356064
Cend1	1.49568	0.0356198
Fbxo18	0.419594	0.0356693
Avpi1	0.64886	0.0357882
Mgst1	0.538431	0.0357882
Stk10	-0.625586	0.0357904
Flrt2	-1.356	0.0361929
Adora2b	-2.54216	0.0363054
Ccdc90b	0.445325	0.0363127
Tssk1	2.19361	0.0363983
Gabbr1	-0.552011	0.0364142
2900026A02Rik	-0.562998	0.0364187
Rif1	-0.55674	0.0364187
Dzip3	-0.598485	0.0364591
Clmp	0.847722	0.0365011
Cbln1	-4.29315	0.0365011
Prokr1	-1.61189	0.0365011
Fdft1	0.643695	0.0365011
Atp5g2	0.492717	0.0367427
Sgta	0.489012	0.0367427
Alg5	0.419592	0.0367427
Lss	0.867053	0.0367506
Akt3	-0.601732	0.0367506
Heatr2	0.475067	0.0367506
Nrtn	2.52798	0.0369522
Malsu1	0.764885	0.0370075
Gls	-0.451289	0.0370075
Sirt5	0.674617	0.0370075
Bid	-0.669623	0.0370416
G6pc3	0.44467	0.0371598
Smc4	-0.602703	0.0372361
Gcc1	-0.526796	0.0372361
Reep5	0.494878	0.0372361
Aco1	0.499824	0.0373141
Ankrd29	-0.926403	0.0373552
Rbl1	-0.641959	0.0374185
Cerk	-0.648596	0.037419
Elmo1	-0.659498	0.037419
Tmem181a	-0.4807	0.037419
Mup2	2.0972	0.0375943
Gm9899	0.87931	0.0376344
Diap1	-0.50069	0.0376393
Ptgs1	-0.770038	0.0376932
Pcif1	-0.485529	0.0377267
Hk2	0.883323	0.0377627
Actl6b	-4.2851	0.0377627
1110008L16Rik	0.529639	0.0377627
Aqp1	-0.851589	0.0377646
Cxx1c	-0.6449	0.0378006
Nbl1	-0.877667	0.0378116
Git2	-0.436558	0.0378116
Pecam1	-0.527593	0.0378675
Agbl2	2.19872	0.0379227
Polr2m	0.400218	0.0379628
Scyl1	0.397683	0.0381444
Hmgn5	0.493834	0.0381451
Npnt	1.29739	0.0382709
Polr2l	0.524505	0.0382709
Gabrb2	-4.56857	0.038396
Lasp1	-0.502707	0.0387495
Mamld1	0.692885	0.0387504
Dgkz	-0.541582	0.0387504
Gramd4	-0.530735	0.0387657
Grk6	-0.498688	0.0387874
Uros	0.478867	0.0388501
Auh	0.601002	0.0390895
Kcnn3	-1.77971	0.0392746
D630041G03Rik	-4.14625	0.0392888
Tspyl2	-0.430235	0.0394138
Mettl7a2	5.87841	0.0397886
Praf2	-0.597812	0.0397886
Pnpt1	0.464444	0.0398063
Tpm4	-0.610235	0.0398063
Cuta	0.464952	0.0399219
Kctd10	-0.516094	0.0400413
Rprd2	-0.430198	0.0400981
Sema5a	-0.852796	0.0400981
Arhgef9	0.564264	0.0401567
Man2b2	-0.509693	0.0401739
Wipf1	-0.623964	0.0402015
Pemt	0.788708	0.0406422
Eif3l	0.397483	0.0406467
2310069G16Rik	1.57759	0.0406467
Spink10	4.04251	0.0406588
Fbxo22	-0.483984	0.0406588
Gabra3	-1.10043	0.0406588
AA986860	0.902364	0.04078
Man2a1	-0.566008	0.0408165
Mettl7b	-1.55565	0.0409064
Medag	-1.02343	0.0411139
Helz2	-0.544756	0.0411622
Ino80d	-0.467114	0.0412147
Pdp2	0.785095	0.04126
Gm4841	2.02879	0.04126
Rgag1	1.42551	0.04126
Cdk4	-0.438214	0.041404
Asb16	4.24031	0.0414355
Trpv3	1.6455	0.0415951
Cryz	0.670011	0.0418533
Arc	-1.0146	0.0418838
Aicda	-2.36713	0.0420671
Arsi	-1.23949	0.0421145
Nvl	-0.508093	0.0421999
Kcnab3	1.01203	0.0423031
Snrpc	0.46059	0.0423031
Polq	-1.1787	0.0423165
Lmod3	2.51329	0.0424491
Ldb1	-0.479124	0.0424668
Tnrc18	-0.509692	0.0424668
Vamp4	-0.593212	0.0426673
H1fx	1.01684	0.0427591
Cacng5	3.1491	0.0427984
Slmap	0.506843	0.0427984
Fkbp15	-0.437205	0.0429975
Mrpl57	0.695252	0.043019
Yif1a	0.45334	0.0431538
Eps8l1	-3.63176	0.0431719
Lphn1	-0.643349	0.0431889
Ube2f	0.433343	0.0431889
Ccdc88c	-0.750736	0.0433019
Cmtm3	-0.638438	0.0434231
A2m	-3.16964	0.0434231
Pparg	0.532396	0.0434231
Ptgfr	-1.46648	0.043487
Fam96a	0.469874	0.0436987
Derl1	0.522603	0.0438994
Rsbn1l	-0.482753	0.0439402
Fzd1	-0.749691	0.0440174
Wdr83os	0.471546	0.0440174
Glo1	0.676454	0.0440174
Islr2	-1.58469	0.0440955
Clptm1	0.459918	0.0440955
Birc2	-0.486367	0.0441118
4930414L22Rik	0.923414	0.0443256
Dcun1d3	0.838812	0.0444287
Jagn1	0.503081	0.0445231
Ttpal	-0.503644	0.0446112
Socs3	-1.03411	0.0446112
Aim1	-0.608522	0.0446248
Zgpat	-0.49892	0.0446248
Snhg9	2.62993	0.0446276
Patl2	-4.13547	0.0446801
Cdkl2	0.60662	0.0447067
Krt222	0.960413	0.0447946
Dcakd	0.529106	0.0448029
Ankrd44	-0.532074	0.0448065
Ltbp4	-0.607136	0.0448793
Tcn2	0.645137	0.0449205
Cbfb	-0.43465	0.0449664
Ifi203	-0.552396	0.0449664
Myh7b	1.87275	0.0450583
Rbx1	0.423754	0.0452984
Tmem173	-0.793498	0.0453062
Rnase4	-0.795165	0.0454425
Abca9	-0.975076	0.0457101
Tomm34	-0.434882	0.0457101
Trappc2l	0.490034	0.0457101
Abcb7	0.472884	0.0457101
Adrbk1	-0.479004	0.0457101
Lime1	-0.667305	0.0458903
Ctdsp2	-0.433453	0.0459368
Arhgef1	-0.545183	0.0459368
Sp110	-0.619928	0.0459368
Cpxm2	-0.89568	0.0460741
Psmb2	0.389193	0.0460826
Eng	-0.63212	0.0461674
Stk4	-0.497445	0.0462338
Sdhaf1	0.485902	0.0463373
Atp2a1	3.41825	0.0463373
Hist1h3d	1.96048	0.046396
Shmt1	0.653501	0.0466401
Aqp5	3.22418	0.0467639
Lrrn4cl	-1.07259	0.0469438
Ube2a	0.458425	0.047111
Rap1gap	1.41524	0.0472257
Lrrc39	0.674944	0.0473658
Vegfa	0.609247	0.0473658
0610010F05Rik	0.511593	0.0475692
Npat	-0.454492	0.0475692
Dnajc18	-0.516968	0.0475692
Tbc1d7	0.634474	0.0475692
Ankrd40	0.477969	0.0476711
Accsl	1.57362	0.0476711
Hephl1	1.9215	0.0476764
Rdh13	0.563978	0.0476825
Fah	0.600836	0.0477084
Nap1l1	-0.602735	0.0477084
Dag1	0.618963	0.0477084
Commd10	0.460759	0.0477483
Pfkfb1	0.542213	0.0477542
Hoxc6	0.681173	0.047904
Chst1	-1.06755	0.0479142
H2-Aa	-0.60592	0.0479313
Iqgap1	-0.503123	0.0480601
Ralb	0.437347	0.0482328
Gltp	-0.533823	0.0482937
Zfp53	-0.642892	0.0482937
Ddx26b	-0.524754	0.0483952
Sf3b3	-0.460321	0.0484188
Cnpy3	-0.416749	0.0484258
1500011K16Rik	0.580336	0.0484258
Rabgap1l	-0.431288	0.0484358
Gm14403	0.680529	0.0484369
Scrn1	-1.28508	0.0484655
Dchs1	-0.728488	0.048625
Rtca	0.447718	0.048671
Tmem37	1.37316	0.0487123
Gimap8	-0.812121	0.0487123
Rpl36al	0.461843	0.048833
Gm5069	0.933881	0.0488825
Ptgs2	-1.65579	0.0488825
Mrpl16	0.544695	0.0488825
Mtmr12	-0.438298	0.0490302
Fmod	-0.883457	0.0490663
Foxp1	-0.521871	0.0491703
Lbh	-0.618476	0.0492834
Mrpl49	0.399121	0.0492834
Psip1	-0.484876	0.0494996
Boc	-0.691743	0.0495194
Pkp2	-0.790178	0.0496133
Pcdh20	-1.74039	0.0496133
2810004N23Rik	-0.67201	0.0496133
Zfp275	-0.511052	0.0498829
Ahcyl2	-0.589343	0.0500688
