# Supplementary material for: Directing visceral white adipocyte precursors to a thermogenic adipocyte fate improves insulin sensitivity in obese mice
Source: eLife. 2017 Jul 19;6:e27669. doi: 10.7554/eLife.27669 (PMC5552276; doi:10.7554/eLife.27669)
Supplement: Figure 4—source data 3. — DOI: http://dx.doi.org/10.7554/eLife.27669.010 [file elife-27669-fig4-data3.xlsx]

## Sheet: STable 3
Figure 4- source data 3
Genes whose expression is significantly altered in gonadal WAT of Vis-KO CL316,243 treated mice											Genes whose expression is significantly altered in Inguinal WAT of CL316,243 treated mice
Gene Name	log2 FC (KO/Control)	FDR									Gene Name	log FC (CL/Vehicle)	FDR
42795	-1.57353	6.07347e-05									42795	1.32847	0.033515
1190005I06Rik	1.12595	0.0105452									1190005I06Rik	1.02738	0.0237983
1700021F05Rik	0.497632	0.0420372									1700021F05Rik	1.33877	2.06492e-12
1700037H04Rik	1.03661	5.0815e-07									1700037H04Rik	0.660202	0.00198727
1700047G03Rik	-2.76492	3.51347e-05									1700047G03Rik	-1.97442	0.00724304
2010003K11Rik	0.91119	0.000532367									2010003K11Rik	1.38057	1.46857e-09
2010107E04Rik	0.690649	0.00955041									2010107E04Rik	1.24526	2.50539e-08
2900026A02Rik	0.635388	0.0135591									2900026A02Rik	-0.562998	0.0364187
4930546K05Rik	2.02251	0.000202295									4930546K05Rik	3.59399	0.00506184
Abca6	-1.37895	0.0112005									Abca6	-1.16391	0.034039
Abca9	-1.76692	8.42394e-05									Abca9	-0.975076	0.0457101
Abhd6	0.695477	0.000800062									Abhd6	1.05589	5.46837e-09
Acaa2	0.535059	0.0280992									Acaa2	1.72127	3.37846e-19
Acadvl	0.641275	0.00685438									Acadvl	1.60569	2.49376e-16
Acot11	2.30036	9.85945e-06									Acot11	1.73438	0.000430351
Acot13	0.755583	0.000461728									Acot13	1.00834	6.78121e-08
Acsf2	0.652007	0.0027479									Acsf2	1.22041	3.17697e-11
Adamts2	-0.930669	0.0129104									Adamts2	-1.09436	0.00163103
Adamts5	-1.00412	0.0145683									Adamts5	-1.47518	3.99195e-05
Adtrp	1.46619	0.00790003									Adtrp	1.47381	0.00603579
Ahcyl2	-0.601141	0.0465333									Ahcyl2	-0.589343	0.0500688
Ahnak	-0.783776	0.0183295									Ahnak	-0.779433	0.0171496
Akr1b10	0.671428	0.000816345									Akr1b10	1.21898	1.72815e-12
Aldh1l1	-0.826959	0.000694605									Aldh1l1	0.855168	0.000135881
Amacr	0.603886	0.0191809									Amacr	0.916912	3.81794e-05
Angptl2	-0.717572	0.0257543									Angptl2	-0.681841	0.0339162
Arhgdia	-0.487918	0.0275577									Arhgdia	-0.520557	0.014522
Arhgdig	2.63112	0.0228984									Arhgdig	2.64527	0.0337215
Arhgef19	1.98422	0.0399774									Arhgef19	3.15197	0.000753405
Atp5h	0.515229	0.0282228									Atp5h	1.13126	1.94233e-09
Atp5j2	0.646466	0.00718658									Atp5j2	1.38976	3.34077e-12
Bmp3	-1.40085	0.0269208									Bmp3	-1.32275	0.0309862
Bmp8b	2.58329	0.00918514									Bmp8b	4.95187	1.9932e-08
Cacng5	4.48516	0.000321188									Cacng5	3.1491	0.0427984
Car14	2.75241	4.4084e-05									Car14	4.78483	2.24155e-22
Cbr1	0.485118	0.0194439									Cbr1	0.750899	2.30806e-05
Ccdc3	0.613281	0.0293944									Ccdc3	0.662075	0.0139744
Ccdc80	-1.0947	0.00527025									Ccdc80	-1.44804	3.79508e-05
Cdc42ep1	-0.856922	0.0038116									Cdc42ep1	-1.10796	2.97807e-05
Chchd2	0.651083	0.0301255									Chchd2	1.40368	6.9229e-09
ChkbCpt1b	1.27561	1.60175e-09									ChkbCpt1b	0.990571	1.39329e-06
Ciapin1	0.698062	0.00599547									Ciapin1	0.60469	0.0183461
Cidea	3.94545	8.02384e-52									Cidea	1.45968	1.10196e-08
Clmp	-1.13777	0.0027479									Clmp	0.847722	0.0365011
Cmklr1	-1.27792	0.00079032									Cmklr1	-0.958456	0.0139218
Cox17	0.698286	0.0215284									Cox17	1.18926	3.01428e-06
Cox4i1	0.528048	0.0442028									Cox4i1	1.31087	1.44972e-10
Cox6c	0.671525	0.0182887									Cox6c	1.0513	1.51775e-05
Cpn2	2.76501	1.31392e-09									Cpn2	1.03142	0.000401796
Cpt1b	1.89171	1.2311e-14									Cpt1b	1.2733	1.36838e-07
Cpxm2	0.958887	0.0161656									Cpxm2	-0.89568	0.0460741
Ctsd	-0.665731	0.0127803									Ctsd	0.641969	0.0154867
Cxadr	1.91891	2.84097e-11									Cxadr	1.01205	0.000893569
Cycs	0.660061	0.00461759									Cycs	1.55515	9.09685e-16
D430019H16Rik	-1.27027	0.00641985									D430019H16Rik	-1.71542	6.74974e-05
Ddo	0.72756	0.0155917									Ddo	1.3561	5.25987e-08
Ddt	0.704534	0.0074393									Ddt	0.805578	0.00102206
Dhcr24	-0.970137	0.00135948									Dhcr24	0.879262	0.00271171
Dhrs4	0.979743	1.57875e-05									Dhrs4	0.961497	4.32419e-06
Dnajc15	0.483223	0.0449022									Dnajc15	1.06569	1.78865e-08
Dock10	-1.03591	0.000179898									Dock10	-0.619398	0.0326085
Dpt	-0.938692	0.00400938									Dpt	-1.19027	4.33261e-05
Dysf	0.503268	0.0478992									Dysf	0.746328	0.000723834
Eci2	0.62796	0.00239482									Eci2	0.879955	1.20912e-06
Ecsit	0.494424	0.0159488									Ecsit	1.11451	1.82698e-11
Elovl1	-0.692652	0.00459547									Elovl1	-0.568417	0.0252914
Emilin2	-1.51439	0.0235127									Emilin2	-1.50124	0.0229652
Endog	1.00457	0.0337904									Endog	1.35181	0.00155822
Esrp2	1.91469	0.0333829									Esrp2	2.27257	0.00985941
Esrrg	1.36483	0.00171428									Esrrg	1.40664	0.00056875
Esyt1	-0.704685	0.000759002									Esyt1	-0.701976	0.000295829
Etfb	0.618066	0.0127363									Etfb	1.35532	2.55183e-11
Fabp3	3.17131	5.5861e-12									Fabp3	2.25952	3.48801e-07
Fabp5	-1.18482	0.000397789									Fabp5	1.59475	4.39494e-08
Fads3	-0.81924	0.0107027									Fads3	-0.783646	0.0142106
Fam131c	5.5788	0.000276958									Fam131c	7.19098	8.57278e-06
Fastkd2	0.531907	0.0135591									Fastkd2	0.487883	0.0241631
Fbxl4	-0.652051	0.00327538									Fbxl4	0.709845	0.000744464
Fkbp15	-0.502623	0.0179633									Fkbp15	-0.437205	0.0429975
Fmod	0.987832	0.0228777									Fmod	-0.883457	0.0490663
Fuom	0.599802	0.0445191									Fuom	1.51585	1.27483e-10
G6pdx	-0.697157	0.0424201									G6pdx	0.999143	0.000816995
Gars	0.457373	0.0132565									Gars	0.877468	8.81108e-09
Gas7	-1.20966	0.0111147									Gas7	-1.03679	0.0326888
Gchfr	3.28442	5.06556e-13									Gchfr	1.57232	0.0212684
Gm12657	2.87677	0.0238865									Gm12657	2.73357	0.0295851
Gm9696	-1.44865	0.0452046									Gm9696	3.17408	3.61443e-06
Gnao1	0.872511	0.000202295									Gnao1	2.0587	2.07029e-25
Grb14	0.776415	0.0269208									Grb14	-0.92524	0.00258077
Gsn	-0.83212	0.00268366									Gsn	-1.09118	9.28944e-06
Gss	0.893793	0.00026987									Gss	0.625393	0.015936
Gyk	1.71779	0.0109571									Gyk	1.56179	0.0211938
Hadha	0.663739	0.0186898									Hadha	1.4347	4.42063e-10
Hadhb	0.70317	0.00226305									Hadhb	1.1853	1.63187e-09
Heph	-0.654593	0.0134508									Heph	-0.634611	0.0164973
Hephl1	-3.58564	0.000188751									Hephl1	1.9215	0.0476764
Hoxa4	0.721734	0.0332708									Hoxa4	1.95202	3.76358e-12
Hp	-1.18114	0.00222771									Hp	-1.17201	0.00145412
Igfbp2	2.20456	0.000896714									Igfbp2	-1.67994	0.0162655
Impa2	1.48841	7.05627e-05									Impa2	1.49596	8.91258e-06
Inhbb	-0.872602	0.0119609									Inhbb	-1.46552	5.97456e-07
Inpp5d	-0.827147	0.017567									Inpp5d	-0.722029	0.0312565
Iqgap1	-0.786364	0.000800062									Iqgap1	-0.503123	0.0480601
Kcnk3	0.810229	0.0239905									Kcnk3	1.00989	0.00198502
Khdrbs3	1.66173	1.76913e-17									Khdrbs3	1.52655	7.04142e-16
Klb	-0.727126	0.0450555									Klb	0.859877	0.0111331
Lace1	0.702769	0.000672203									Lace1	1.4115	2.57615e-16
Lama2	-0.851636	0.0461441									Lama2	-1.19133	0.00140921
Lbh	0.881693	0.00286267									Lbh	-0.618476	0.0492834
Letmd1	0.584323	0.0155953									Letmd1	1.79389	2.43528e-20
Lmo7	0.846856	0.000992501									Lmo7	-0.656623	0.0167522
Lss	-1.01172	0.0118781									Lss	0.867053	0.0367506
Lyrm7	0.670689	0.0187398									Lyrm7	0.683814	0.012699
Mab21l2	2.63923	0.0172678									Mab21l2	2.09509	0.000125786
Man2a1	-0.555629	0.0493054									Man2a1	-0.566008	0.0408165
Maoa	0.850891	1.32076e-05									Maoa	0.752784	8.84758e-05
Map7d2	-1.82977	0.000472721									Map7d2	2.04832	0.00801942
Me2	-0.898364	6.85443e-05									Me2	-0.509595	0.0335798
Mgl2	-0.799152	0.0140285									Mgl2	-0.855894	0.00484452
Mgst3	-0.598015	0.0074393									Mgst3	-0.58736	0.00774557
Minos1	0.584305	0.0487213									Minos1	1.52509	3.90683e-11
Mogat2	-1.81304	0.0011628									Mogat2	1.83378	0.000886416
Mrpl18	0.452485	0.0297654									Mrpl18	0.622449	0.000710035
Mrpl30	0.495156	0.0220547									Mrpl30	1.16722	1.84376e-11
Mrpl35	0.403666	0.0363351									Mrpl35	0.907616	2.74962e-09
Mrpl47	0.657463	0.00835285									Mrpl47	0.843931	0.000129079
Mrpl51	0.441126	0.0344018									Mrpl51	1.18331	4.69134e-13
Mrps16	0.525931	0.0282992									Mrps16	0.836343	3.68349e-05
Mrps23	0.412104	0.0486684									Mrps23	0.733251	1.64018e-05
Mrps36	0.595707	0.0186898									Mrps36	1.30662	1.45655e-10
Mtx1	0.447962	0.033466									Mtx1	0.609567	0.00112228
Mycbp2	-0.632993	0.0360567									Mycbp2	-0.665367	0.0224311
Myo5b	2.14883	2.09766e-05									Myo5b	1.14709	0.0351502
Myot	7.85118	0.00680911									Myot	6.37785	0.015067
Ndufa11	0.576129	0.0139594									Ndufa11	1.24177	9.81376e-11
Ndufa12	0.538148	0.0220051									Ndufa12	1.10467	7.12198e-09
Ndufa3	0.672668	0.00598996									Ndufa3	0.764034	0.00075129
Ndufa5	0.796777	0.000981005									Ndufa5	1.2708	9.6378e-10
Ndufa8	0.519325	0.0149776									Ndufa8	1.13378	6.62194e-11
Ndufaf4	0.64759	0.00584509									Ndufaf4	0.946192	3.46378e-06
Ndufb10	0.574974	0.0219345									Ndufb10	1.14043	2.5513e-08
Ndufb4	0.578748	0.027041									Ndufb4	1.23314	5.10771e-09
Ndufc1	0.573278	0.0445994									Ndufc1	1.54375	4.03192e-12
Ndufs6	0.529131	0.0491162									Ndufs6	1.06999	5.88233e-07
Ndufs7	0.623416	0.0322793									Ndufs7	1.39317	2.39154e-09
Ndufv2	0.541336	0.0135651									Ndufv2	1.27178	1.00384e-12
Npnt	1.32802	0.0316283									Npnt	1.29739	0.0382709
Npr3	-2.51919	4.88254e-07									Npr3	-2.13973	5.91029e-06
Oplah	1.06801	1.15942e-05									Oplah	1.27976	4.46787e-09
Otop1	2.11085	1.08684e-07									Otop1	1.16768	0.00191223
P2rx5	1.55015	3.25305e-08									P2rx5	1.08494	7.50605e-05
Pald1	0.787838	0.000798723									Pald1	0.677738	0.00318809
Phc3	-0.54381	0.0276479									Phc3	-0.572194	0.0153777
Phgdh	-0.803896	0.00246506									Phgdh	-0.9292	0.000137006
Phldb1	-0.858348	0.00513195									Phldb1	-0.903852	0.0019165
Phospho1	1.02125	0.000785265									Phospho1	1.44683	4.13056e-08
Pim1	0.878971	0.00299311									Pim1	1.06283	3.90432e-05
Plet1os	2.02046	0.0327745									Plet1os	1.50063	0.00459967
Plin5	1.4465	4.24793e-05									Plin5	1.2043	0.000270647
Polr2i	0.748502	0.00289907									Polr2i	0.569164	0.0325888
Ppif	0.598908	0.0191481									Ppif	1.40744	1.0725e-11
Psmb11	3.8574	0.00165884									Psmb11	2.60162	0.0315178
Psmb5	0.518365	0.0141219									Psmb5	0.89773	4.9184e-07
Ptgfr	-2.18405	0.0192138									Ptgfr	-1.46648	0.043487
Pvrl2	0.581552	0.0143558									Pvrl2	0.593659	0.0101128
Rap1gap	1.5729	0.0261062									Rap1gap	1.41524	0.0472257
Rfk	0.41496	0.0173667									Rfk	0.450452	0.00647496
Rims4	-1.51667	0.0129104									Rims4	1.36174	0.0288768
Rnf7	0.400465	0.0478287									Rnf7	0.525822	0.00373806
Rnpep	-0.79358	7.6544e-06									Rnpep	0.532688	0.00291177
Rsad1	1.17504	1.35045e-07									Rsad1	0.830366	0.000244328
S100b	1.95211	7.38808e-08									S100b	1.72318	1.33328e-07
Sdc3	-0.604416	0.0375036									Sdc3	-0.640123	0.0221101
Sdhaf1	0.526334	0.0294448									Sdhaf1	0.485902	0.0463373
Sec14l4	1.79537	0.00125967									Sec14l4	1.77203	0.000847937
Sephs2	0.69664	0.00262575									Sephs2	0.723683	0.000893569
Serpina3n	-1.25841	0.00554865									Serpina3n	-1.29909	0.00280065
Slc16a1	0.761394	0.009126									Slc16a1	1.40159	1.05609e-08
Slc25a10	-1.05061	0.00960575									Slc25a10	0.921646	0.0257396
Slc25a20	0.894495	0.00172379									Slc25a20	1.80614	1.04626e-13
Slc25a33	0.852171	0.0256597									Slc25a33	1.04906	0.00309824
Slc25a42	1.03578	0.00153165									Slc25a42	1.0147	0.00112179
Slc36a2	0.712039	0.00180847									Slc36a2	0.941109	2.99597e-06
Slirp	0.550978	0.0233692									Slirp	0.901545	1.34775e-05
Slit3	-0.815024	0.0354204									Slit3	-1.41338	1.39395e-05
Smc4	-0.662294	0.0222871									Smc4	-0.602703	0.0372361
Sncg	-1.29658	0.00596097									Sncg	-1.50626	0.000563365
St3gal2	-0.70825	0.0099593									St3gal2	-0.647892	0.0184798
Stc2	-0.882741	0.0280441									Stc2	-1.04812	0.00537304
Sucla2	0.729329	0.00356894									Sucla2	1.77873	1.68121e-17
Suclg1	0.539576	0.0274551									Suclg1	1.54635	1.09484e-15
Timm10	0.596915	0.0253199									Timm10	1.11894	4.15049e-07
Timm8a1	0.631799	0.0129104									Timm8a1	1.11447	2.06845e-07
Timm8b	0.439724	0.0465725									Timm8b	1.06772	6.19646e-10
Tlcd2	-1.22185	0.0100134									Tlcd2	2.31767	1.26178e-08
Tmem132b	6.71646	0.000111915									Tmem132b	-3.77569	0.0352828
Tmem176b	0.778234	0.0225428									Tmem176b	-0.745085	0.027246
Tmem43	-0.942403	0.00463427									Tmem43	-1.27312	1.46843e-05
Tmem79	1.11592	0.000800062									Tmem79	1.29436	1.525e-05
Tomm40	0.610726	0.0139119									Tomm40	1.02244	1.13884e-06
Tomm5	0.55973	0.0300796									Tomm5	0.621942	0.0110652
Tspan13	0.499105	0.0334876									Tspan13	-0.538847	0.0146823
Tst	1.13321	0.00827089									Tst	1.3427	0.000702834
Ttpal	-0.597368	0.0186618									Ttpal	-0.503644	0.0446112
Tuba8	2.54937	7.78593e-06									Tuba8	2.42295	9.44798e-07
Ucp1	2.90433	3.33561e-09									Ucp1	1.88433	8.59585e-05
Uqcrb	0.545188	0.0390258									Uqcrb	1.45555	1.89763e-12
