# Supplementary figures and images for: Directing visceral white adipocyte precursors to a thermogenic adipocyte fate improves insulin sensitivity in obese mice
Source: eLife journal article supplement (doi:10.7554/elife.27669), 2017-07-19

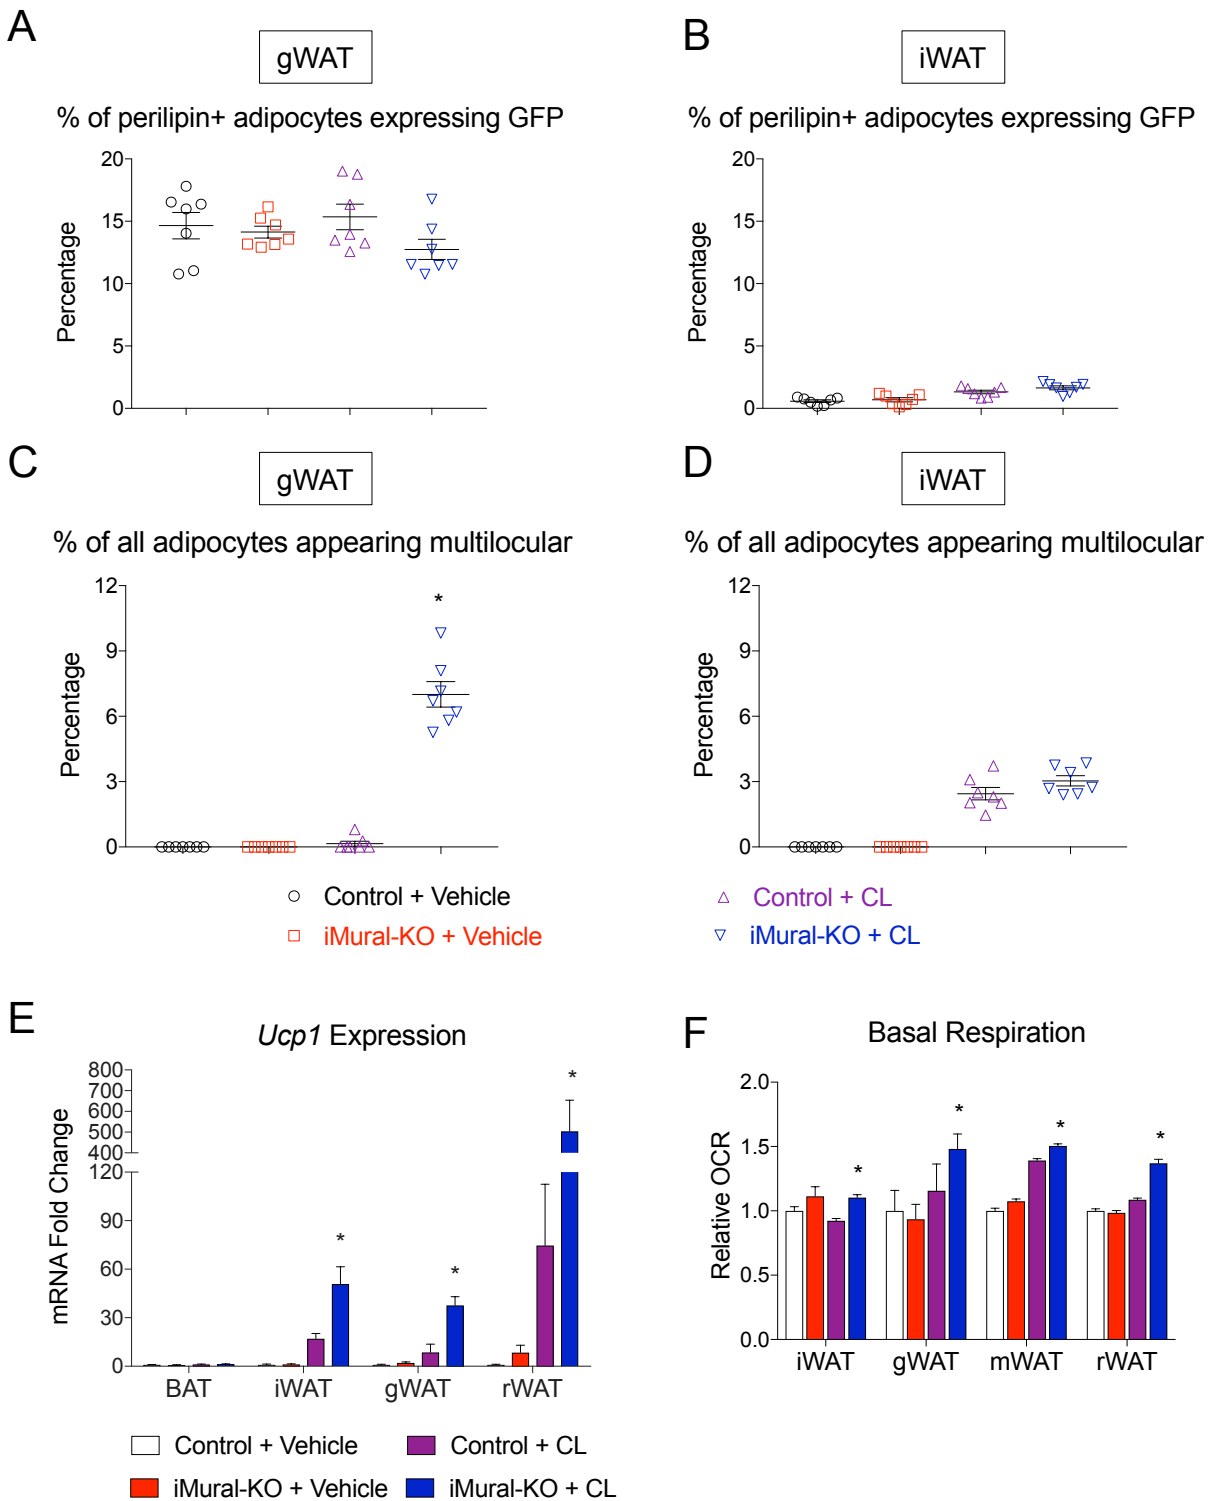

Figure 10- Supplement 1

Supplement: supp [file elife-27669-supp-v1.zip]

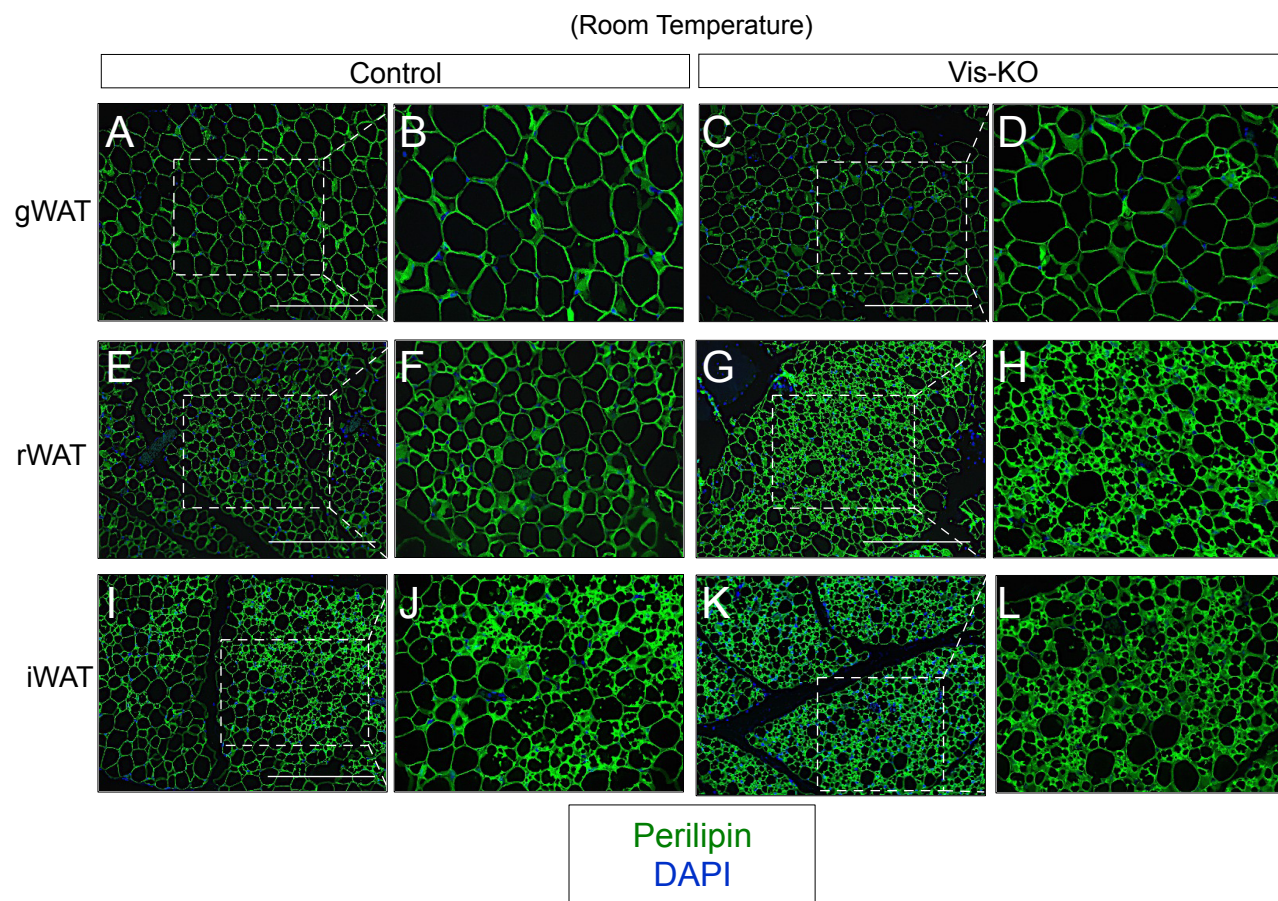

Figure 1- Supplement 1

Supplement: supp [file elife-27669-supp-v1.zip]
